# Supplementary material for: Supramolecular self-assemblies of Ru( ii ) phototherapeutics: biological activity of micro- and nano-particles acting as reservoirs
Source: Royal Society of Chemistry journal article supplement (doi:10.1039/d5tb01785h), 2025-12-18
Supplement: d5tb01785h1.pdf [file d5tb01785h1.pdf]

## Supplementary Information

### Supramolecular Self-Assemblies of Ru(II) Phototherapeutics: Biological Activity of Micro- and Nano-particles Acting as Reservoirs

Jérôme Laisney<sup>b†</sup> and Sarah M. Kriger,<sup>a†</sup> Dmytro Havrylyuk,<sup>a</sup> Jason M. Unrine,<sup>c</sup> David K. Heidary,<sup>a</sup> and Edith C. Glazer<sup>a\*</sup>

<sup>a</sup> Department of Chemistry, North Carolina State University, 2620 Yarbrough Dr., Raleigh, NC, 27607

<sup>b</sup> Department of Chemistry, University of Kentucky, 505 Rose St., Lexington, KY 40506

<sup>c</sup> Department of Plant and Soil Science, University of Kentucky, Lexington, KY 40546, USA

<sup>†</sup> Authors contributed equally

\* To whom correspondence may be addressed: eglazer@ncsu.edu

#### Table of Contents:

**Figure S1.** HPLC chromatograms of [Ru(bpy)<sub>3</sub>](PF<sub>6</sub>)<sub>2</sub>, [Ru(bpy)<sub>3</sub>](Cl)<sub>2</sub>, [Ru(bpy)<sub>2</sub>(dmbpy)](PF<sub>6</sub>)<sub>2</sub> and [Ru(bpy)<sub>2</sub>(dmbpy)](BF<sub>4</sub>)<sub>2</sub> stock compounds.

**Figure S2.** FTIR spectra in the low- and mid-IR range (600-1800 cm<sup>-1</sup>) of the [Ru(bpy)<sub>3</sub>](PF<sub>6</sub>)<sub>2</sub> complex and particles, [Ru(bpy)<sub>2</sub>(dmbpy)](PF<sub>6</sub>)<sub>2</sub> complex and particles, and confining polymers.

**Figure S3.** Transmission Electron Microscopy (TEM) of compound **1** particles prepared by fast precipitation.

**Figure S4.** Scanning Transmission Electron Microscopy (STEM) of compound **1** particles prepared by fast precipitation.

**Figure S5.** The size distribution of [Ru(bpy)<sub>3</sub>](PF<sub>6</sub>)<sub>2</sub> particles.

**Figure S6.** Transmission Electron Microscopy (TEM) of compound **2** particles prepared by fast precipitation.

**Figure S7.** Scanning Transmission Electron Microscopy (STEM) of compound **2** particles prepared by fast precipitation.

**Figure S8.** The size distribution of [Ru(bpy)<sub>2</sub>(dmbpy)](PF<sub>6</sub>)<sub>2</sub> particles.

**Figure S9.** TEM, HAADF and elemental mapping of the **1.6 μm** [Ru(bpy)<sub>3</sub>](PF<sub>6</sub>)<sub>2</sub> microparticles prepared by fast precipitation at 0 °C.

**Figure S10.** TEM, HAADF and elemental mapping of the **0.8 μm** [Ru(bpy)<sub>3</sub>](PF<sub>6</sub>)<sub>2</sub> microparticles prepared by fast precipitation at -75 °C.

**Figure S11.** TEM, HAADF and elemental mapping of the **40 nm PVP** [Ru(bpy)<sub>3</sub>](PF<sub>6</sub>)<sub>2</sub> nanoparticles prepared by fast precipitation at room temperature in the presence of PVP55 confining agent.

**Figure S12.** TEM, HAADF and elemental mapping of the **20 nm PEG** [Ru(bpy)<sub>3</sub>](PF<sub>6</sub>)<sub>2</sub> nanoparticles prepared by fast precipitation at room temperature in the presence of PEG6000 confining agent.

**Figure S13.** TEM, HAADF and elemental mapping of the **3 μm** [Ru(bpy)<sub>2</sub>(dmbpy)](PF<sub>6</sub>)<sub>2</sub> microparticles prepared by fast precipitation at 0 °C.

**Figure S14.** TEM, HAADF and elemental mapping of the **1 μm** [Ru(bpy)<sub>2</sub>(dmbpy)](PF<sub>6</sub>)<sub>2</sub> microparticles prepared by fast precipitation at 0 °C.

**Figure S15.** TEM, HAADF and elemental mapping of the **380 nm PVP**  $[\text{Ru}(\text{bpy})_2(\text{dmbpy})](\text{PF}_6)_2$  nanoparticles prepared by fast precipitation at room temperature in the presence of PVP55 confining agent.

**Figure S16.** TEM, HAADF and elemental mapping of the **300 nm PEG**  $[\text{Ru}(\text{bpy})_2(\text{dmbpy})](\text{PF}_6)_2$  nanoparticles prepared by fast precipitation at room temperature in the presence of PEG6000 confining agent.

**Figure S17.** Chemical structures of polymers used in this study.

**Figure S18.** UV-Visible spectra as function of time of  $[\text{Ru}(\text{bpy})_3](\text{PF}_6)_2$  and  $[\text{Ru}(\text{bpy})_2(\text{dmbpy})](\text{PF}_6)_2$  solubilized complex in methanol dialyzed in water at 37°C in the dark.

**Figure S19.** UV-Visible spectra as function of time of  $[\text{Ru}(\text{bpy})_3](\text{PF}_6)_2$  particle suspensions dialyzed in water at 37°C in the dark or after light activation.

**Figure S20.** UV-Visible spectra as function of time of  $[\text{Ru}(\text{bpy})_2(\text{dmbpy})](\text{PF}_6)_2$  particles suspension dialyzed in water at 37°C in the dark or after light activation.

**Figure S21.** Excitation-emission properties of the  $[\text{Ru}(\text{bpy})_3]\text{Cl}_2$  complex in water and at different concentration.

**Figure S22.** Excitation-emission properties of the  $[\text{Ru}(\text{bpy})_3](\text{PF}_6)_2$  particles compared to the solubilized complex (Cl form) in water (10  $\mu\text{M}$  suspensions).

**Figure S23.** Cytotoxicity dose responses of compound **1** and associated particles in HL60 cells.

**Figure S24.** Cytotoxicity dose responses of compound **1** and associated particles in HeLa cells.

**Figure S25.** Cytotoxicity dose responses of compound **1** and associated particles in A549 cells.

**Figure S26.** Cytotoxicity dose responses of compound **2** soluble complex with 24, 48, and 72 hour incubation following indigo light irradiation for 1 minute in HL60 cells.

**Figure S27.** Cell viability of HL60 cells treated with PVP and PEG polymers.

**Figure S28.** Cytotoxicity dose responses of compound **2**  $\text{PF}_6$  and associated particles in HL60.

**Figure S29.** Cytotoxicity dose responses of compound **2**  $\text{BF}_4$  and associated particles in HL60.

**Figure S30.** Cytotoxicity dose responses of **500 nm** compound **2** particles post-functionalized with positively charge PLR, PLK, and PLO polymer in HL60 cells.

**Figure S31.** Cytotoxicity dose responses of **3.8  $\mu\text{m}$**  compound **2** particles post-functionalized with positively charge PLR, PLK, and PLO polymer in HL60 cells.

**Figure S32.** Cytotoxicity dose responses of **250 nm** compound **2** particles post-functionalized with positively charge PLR, PLK, and PLO polymer in HL60 cells.

**Figure S33.** Accumulation of Ru in A459 cells at 1, 16, and 24 hours for compound **1** and associated particles and the change in intracellular Ru content over time fitted with a linear regression.

**Figure S34.** Fluorescence localization microscopy of compound **1** particles.

**Figure S35.** Seahorse extracellular flux analysis and basal respiration of compound **1** in the absence of light and with 1 minute indigo light irradiation.

**Figure S36.** Seahorse extracellular flux analysis and basal respiration of compound **2** in the absence of light and with 1 minute indigo light irradiation.

**Figure S37.** DAB polymerization in A459 cells followed by light microscopy as function of the irradiation time in presence of the  $[\text{Ru}(\text{bpy})_3](\text{PF}_6)_2$  complex.

**Figure S38.** TEM, HAADF and EDS mapping (Os, O, P, F, Ru) of a 1.6  $\mu\text{m}$  particle undergoing dissolution in A459 cells.

**Figure S39.** STEM images of A549 cells cross sections treated with compound **1** soluble complex and 40 nm PVP particles.

**Figure S40.** TEM and STEM images of A459 cell cross sections for cells untreated or treated with compound **1** and particles for 16 hours.

**Figure S41.** Cytotoxicity dose responses of compound **2** in HeLa cells.

**Figure S42.** Cytotoxicity dose responses of compound **1** and associated particles in HEK cells.



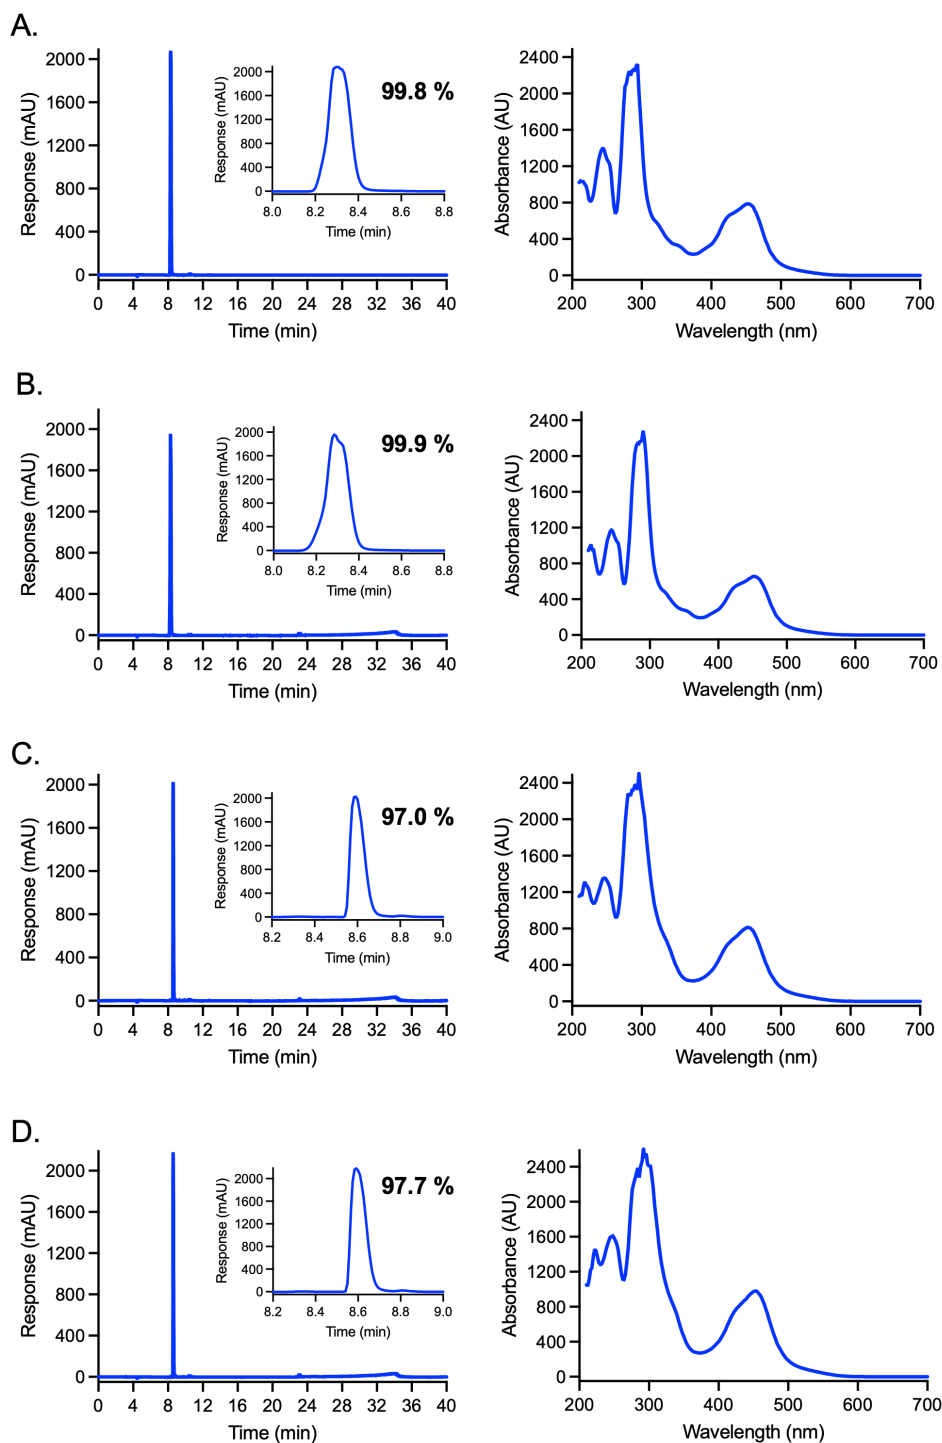

**Figure S1.** HPLC chromatograms of (A) [Ru(bpy)<sub>3</sub>](PF<sub>6</sub>)<sub>2</sub>, (B) [Ru(bpy)<sub>3</sub>](Cl)<sub>2</sub>, (C) [Ru(bpy)<sub>2</sub>(dmbpy)](PF<sub>6</sub>)<sub>2</sub> and (D) [Ru(bpy)<sub>2</sub>(dmbpy)](BF<sub>4</sub>)<sub>2</sub> stock compounds with a zoomed insert of the major peak (inlay), purity value as determined by % area, and extracted UV-Vis spectrum for the major peak (right).

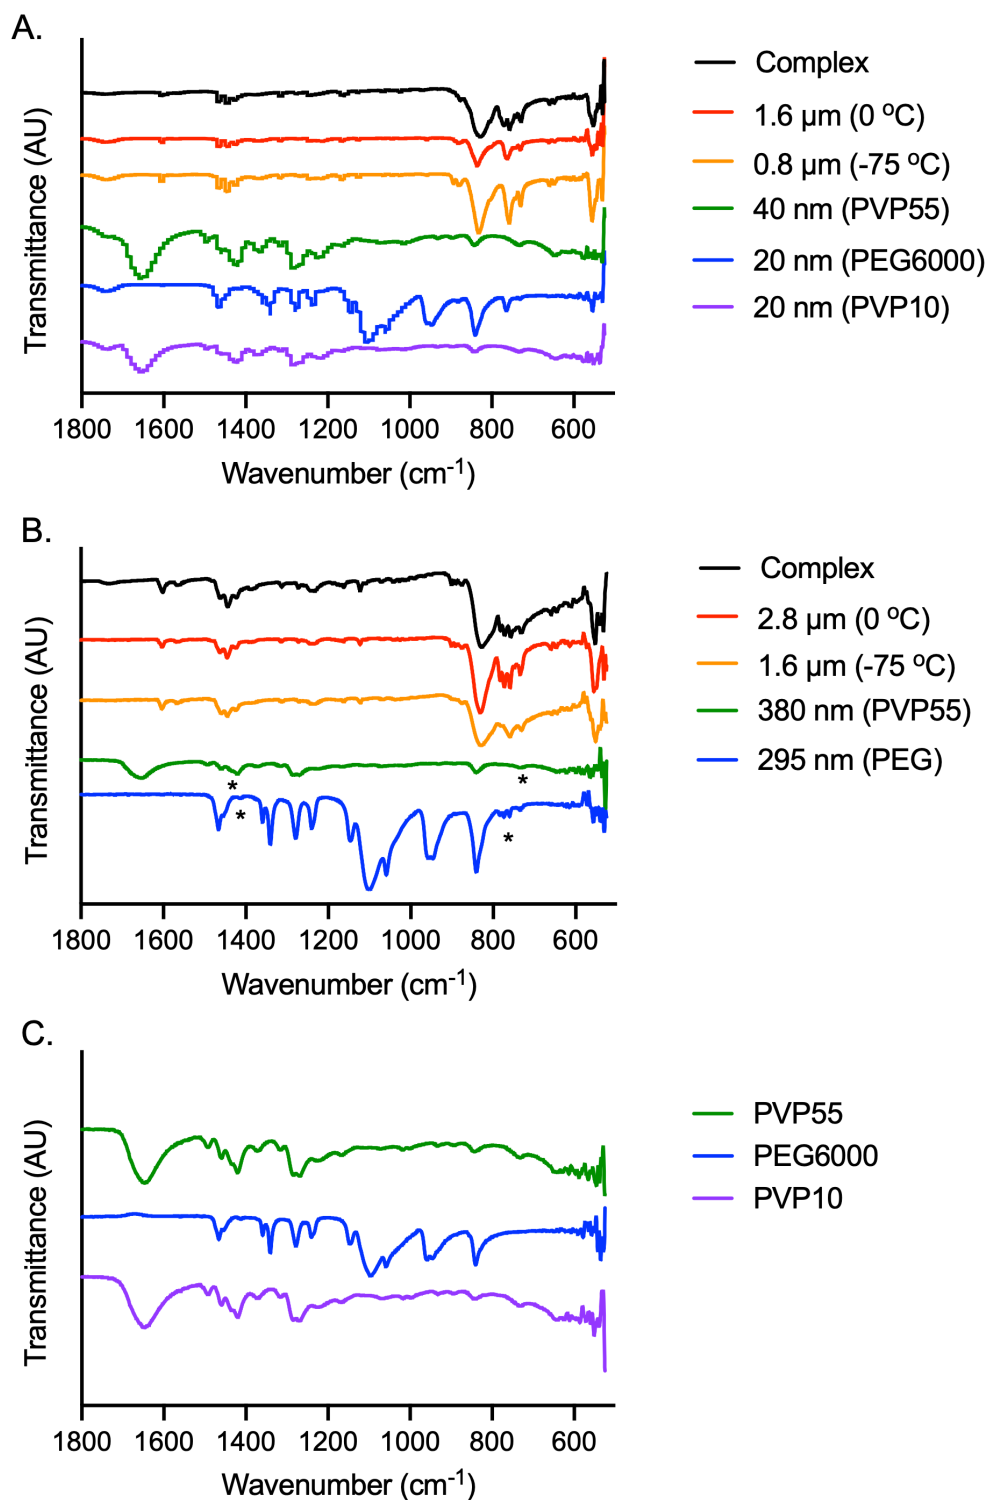

**Figure S2.** FTIR spectra in the low- and mid-IR range ( $600\text{-}1800\text{ cm}^{-1}$ ) of the (A)  $[\text{Ru}(\text{bpy})_3](\text{PF}_6)_2$  complex and particles, (B)  $[\text{Ru}(\text{bpy})_2(\text{dmbpy})](\text{PF}_6)_2$  complex and particles, and (C) confining polymers. (\*) Characteristic peaks of the Ru complex in the nanocomposite spectra (5% Ru:polymer ratio).

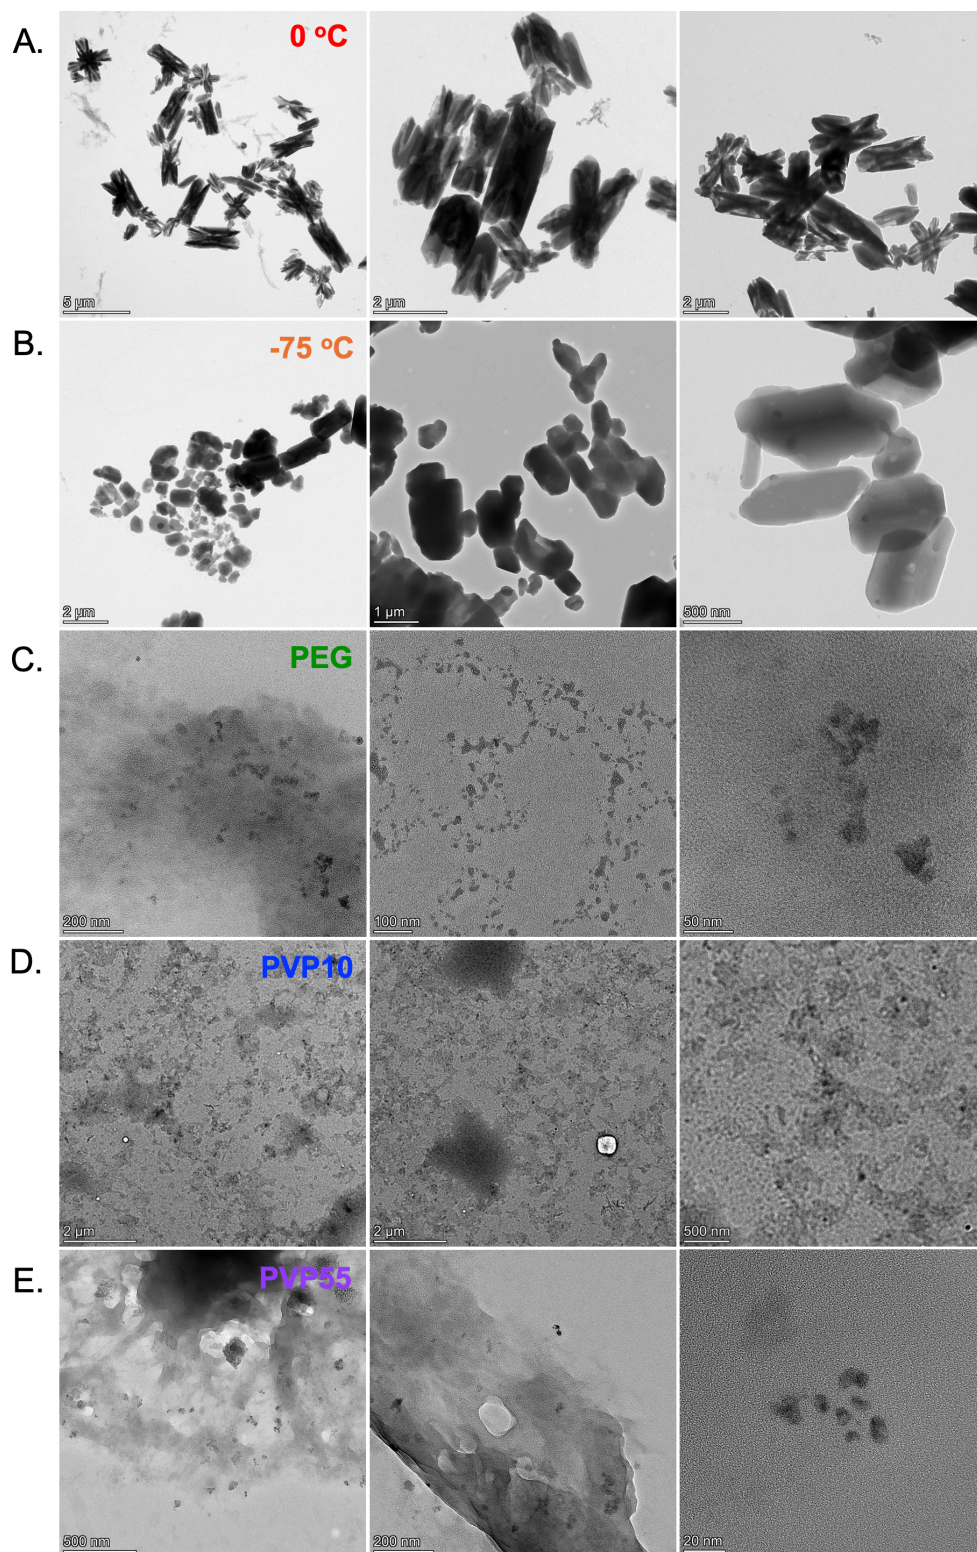

**Figure S3.** Transmission Electron Microscopy (TEM) of compound 1 particles prepared by fast precipitation. Particles formed at (A) 0 °C (1.6  $\mu\text{m}$ ), (B) -75 °C (0.8  $\mu\text{m}$ ), room temperature in presence of (C) PEG6000 (20 nm PEG), (D) PVP10 (40 nm PVP10) and (E) PVP55 (20 nm PVP55).



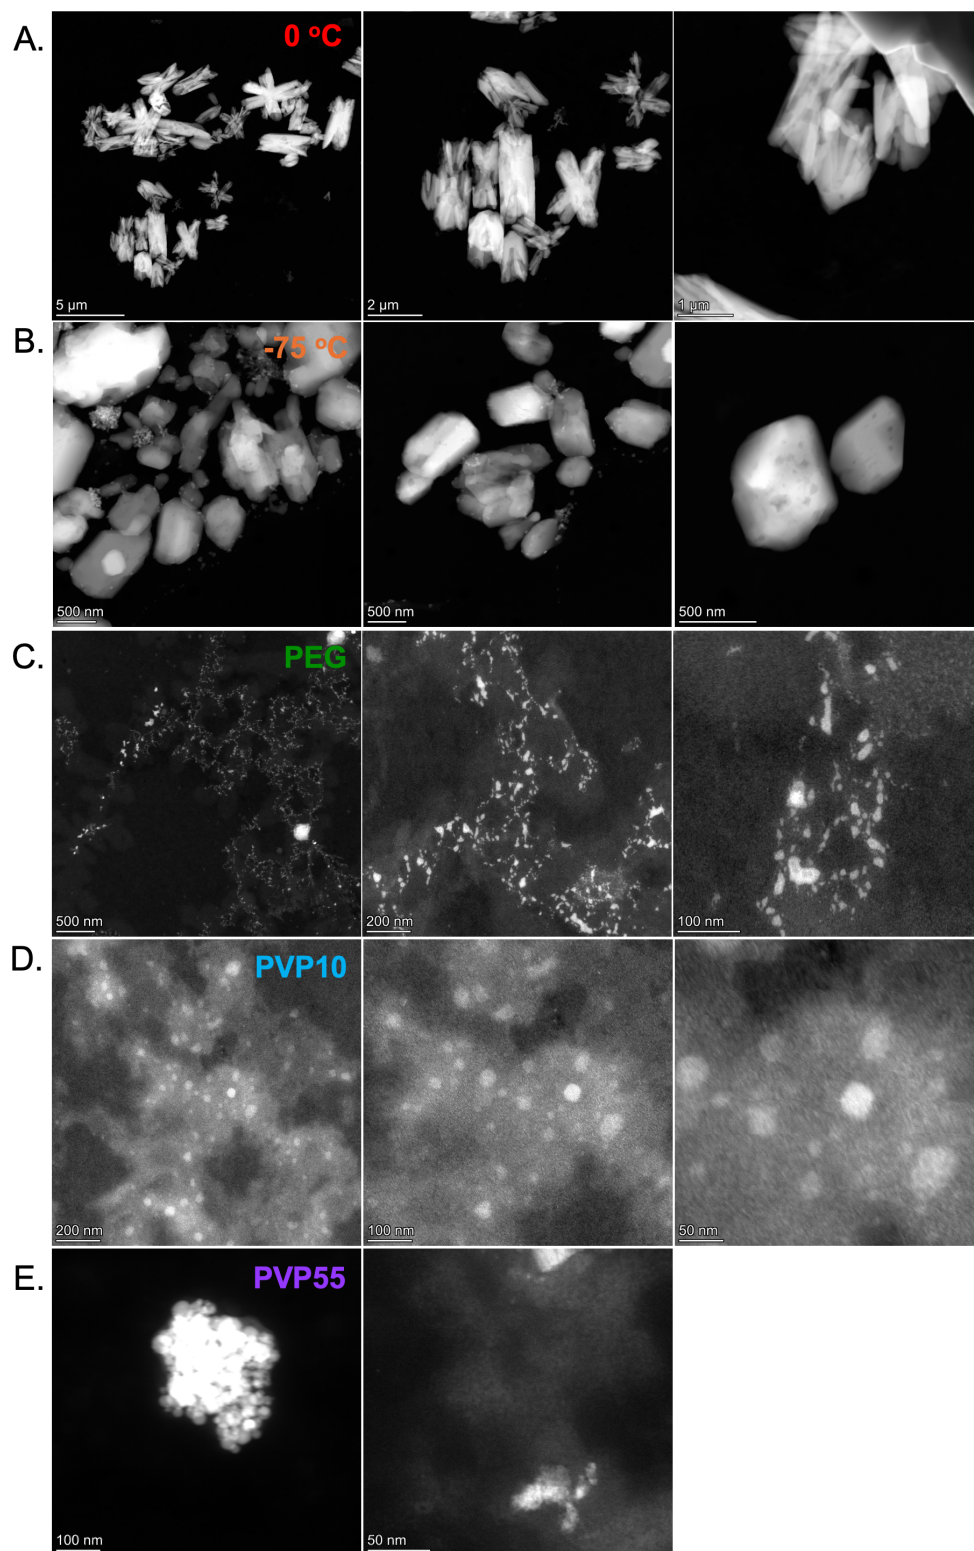

**Figure S4.** Scanning Transmission Electron Microscopy (STEM) of compound **1** particles prepared by fast precipitation. Particles formed at (A) 0 °C (1.6 μm), (B) -75 °C (0.8 μm), room temperature in presence of (C) PEG6000 (20 nm PEG), (D) PVP10 (40 nm PVP10) and (E) PVP55 (20 nm PVP55).

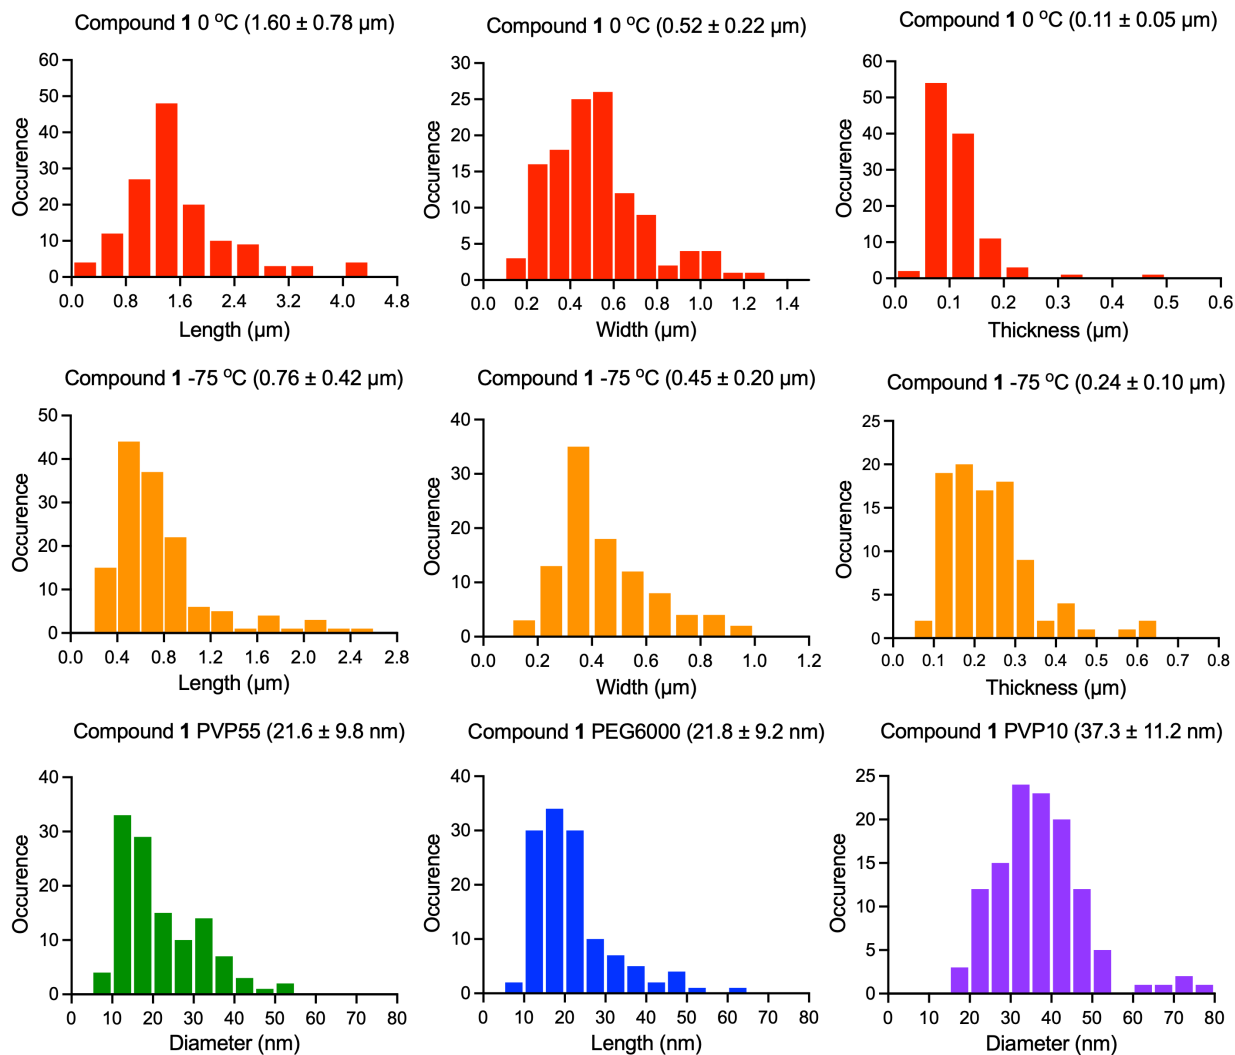

**Figure S5.** The size distribution of  $[\text{Ru}(\text{bpy})_3](\text{PF}_6)_2$  particles. The statistics for size distribution were obtained by measuring the dimensions were obtained by measuring the dimensions (length, width, and thickness) on more than 100 objects.

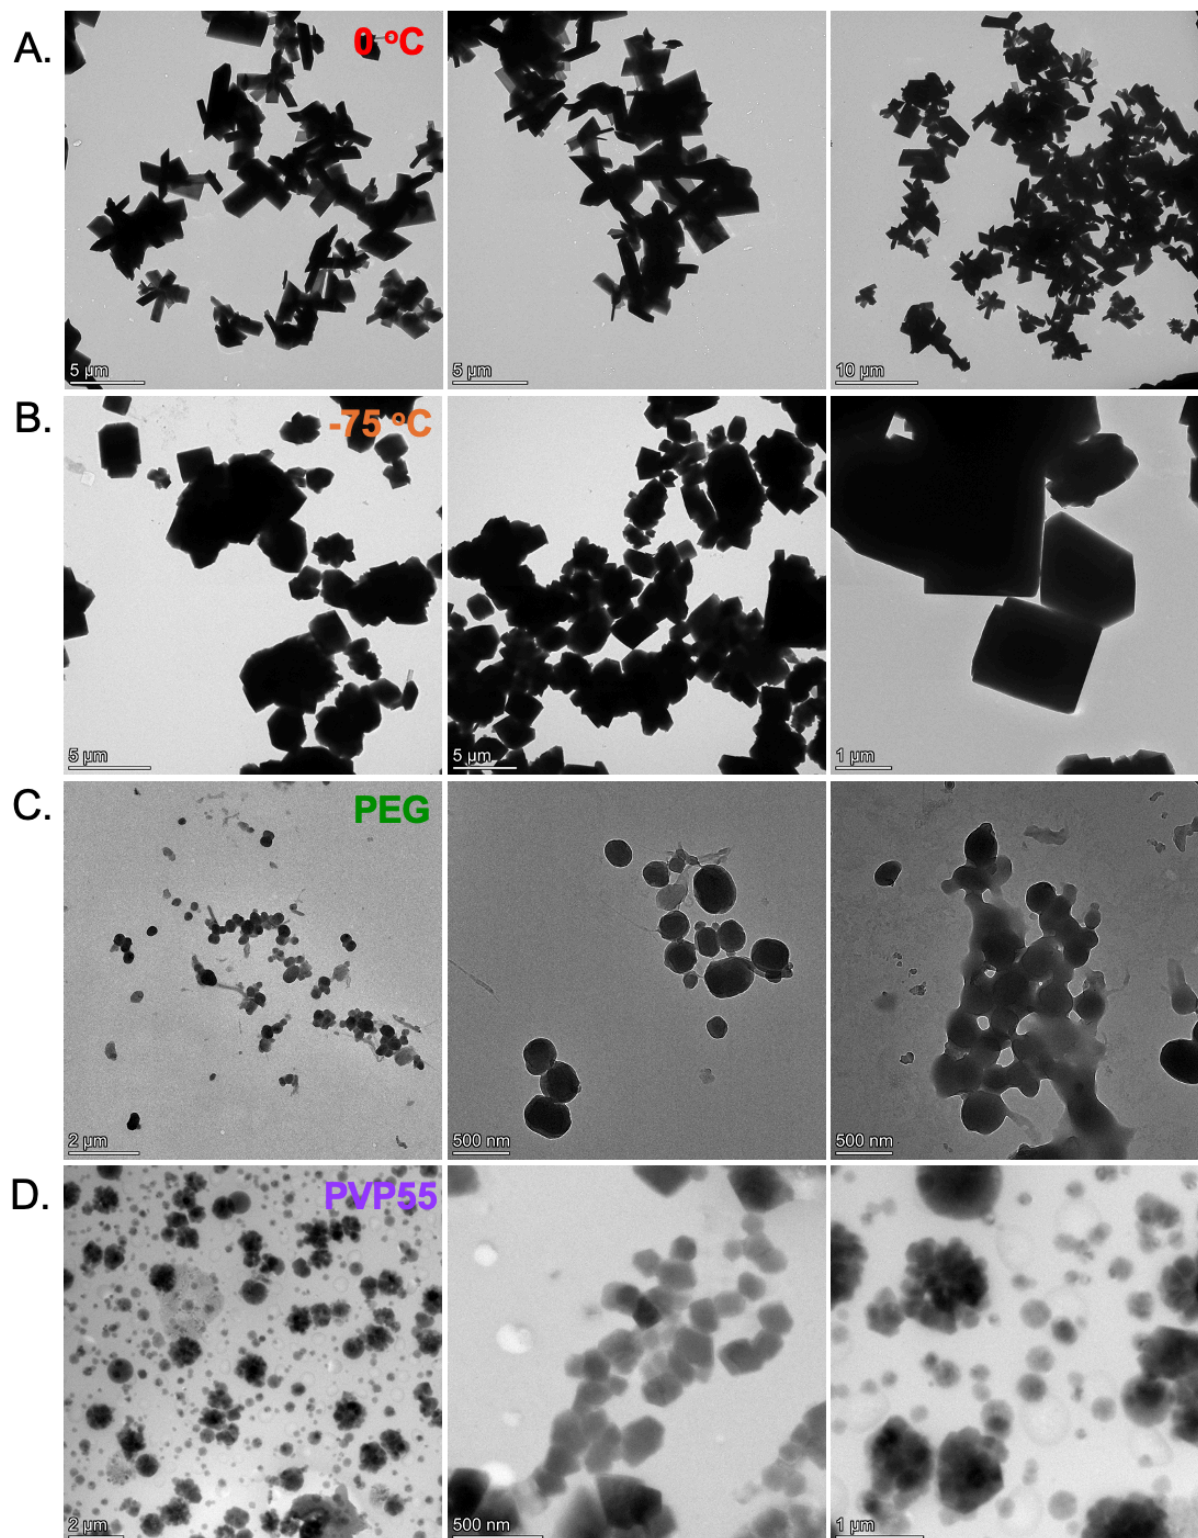

**Figure S6.** Transmission Electron Microscopy (TEM) of compound 2 particles prepared by fast precipitation. Particles formed at (A) 0 °C (2.8 μm), (B) -75 °C (1.6 μm), room temperature in presence of (C) PEG6000 (295 nm PEG), and (D) PVP55 (380 nm PVP55).

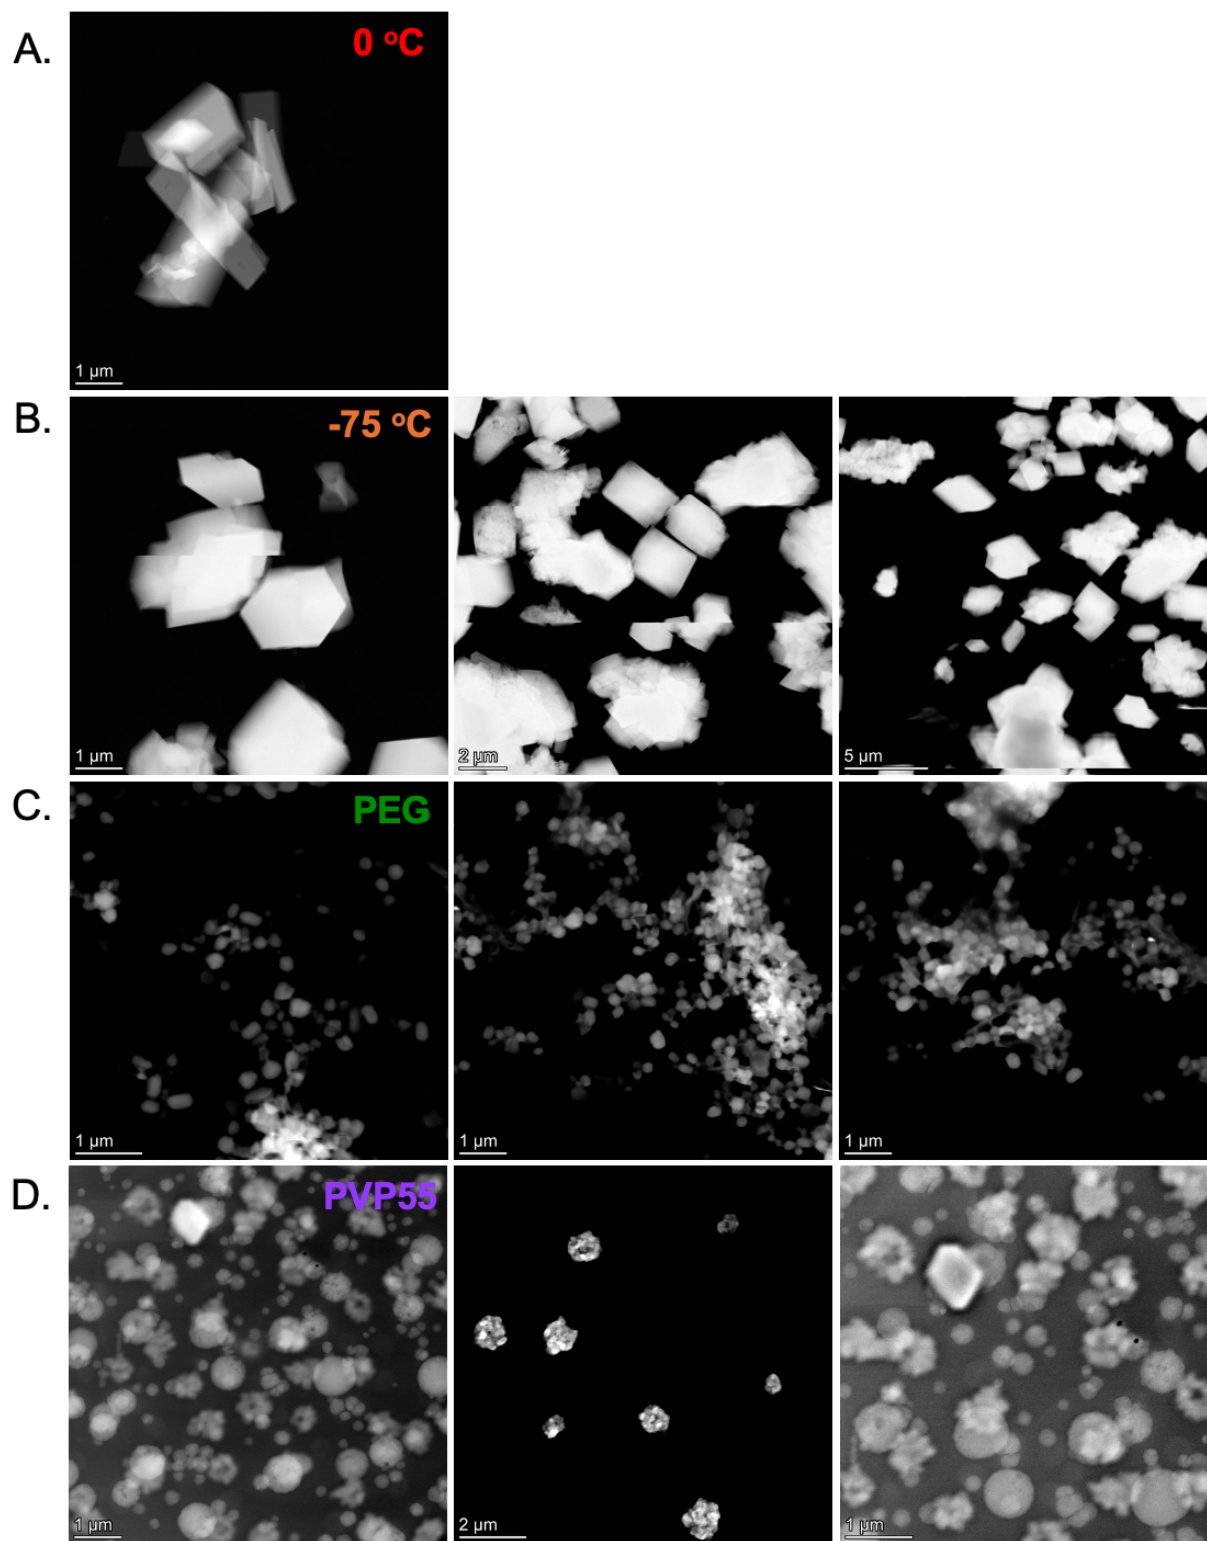

**Figure S7.** Scanning Transmission Electron Microscopy (STEM) of compound **2** particles prepared by fast precipitation. Particles formed at (A) 0 °C (2.8  $\mu\text{m}$ ), (B) -75 °C (1.6  $\mu\text{m}$ ), room temperature in presence of (C) PEG6000 (295 nm PEG), and (D) PVP55 (380 nm PVP55).



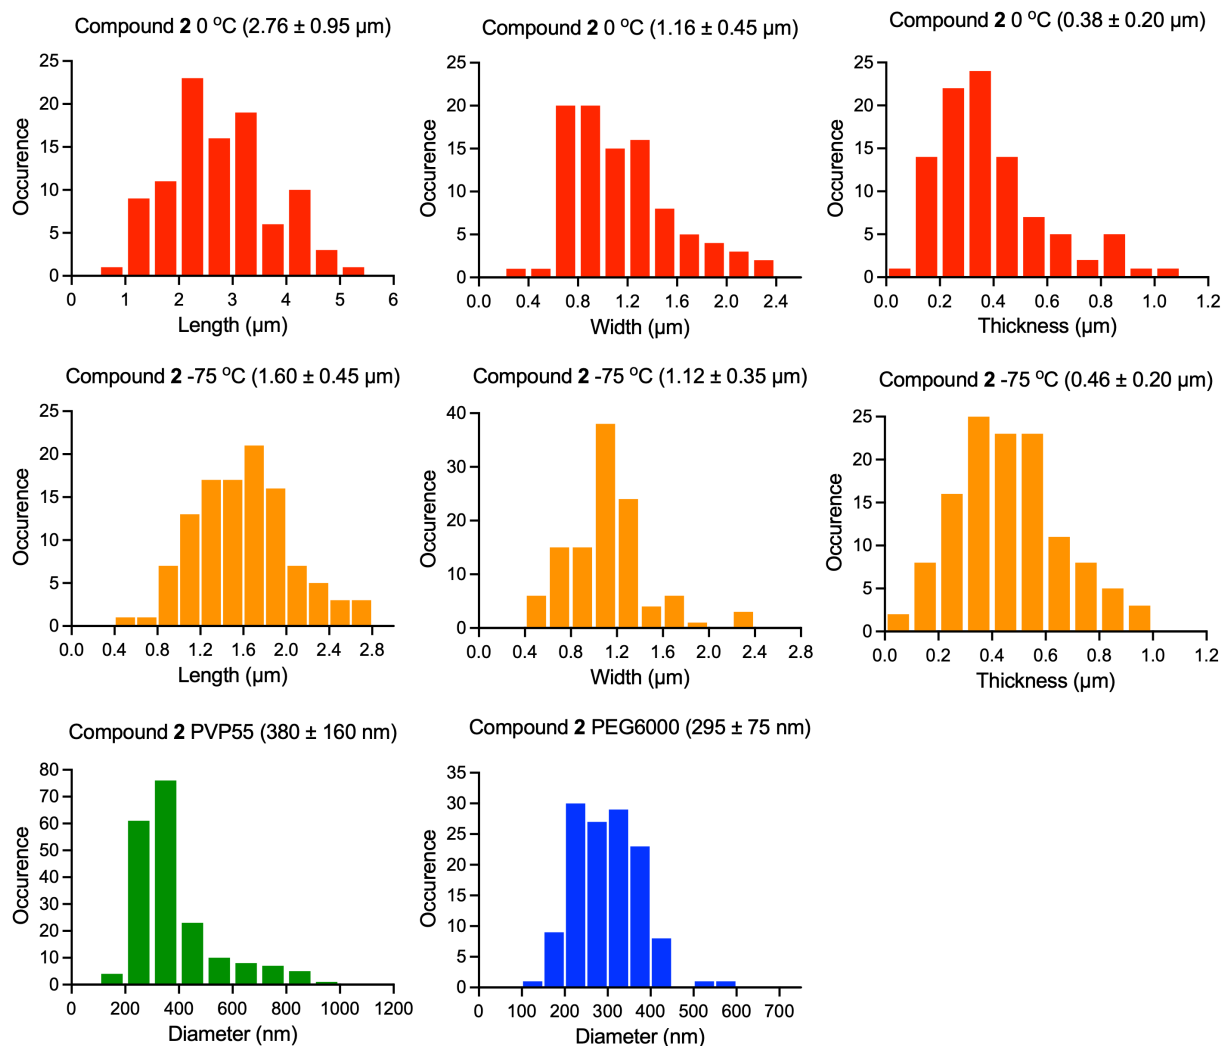

**Figure S8.** The size distribution of [Ru(bpy)<sub>2</sub>(dmbpy)](PF<sub>6</sub>)<sub>2</sub> particles. The statistics for size distribution were obtained by measuring the dimensions were obtained by measuring the dimensions (length, width, and thickness) on more than 100 objects.



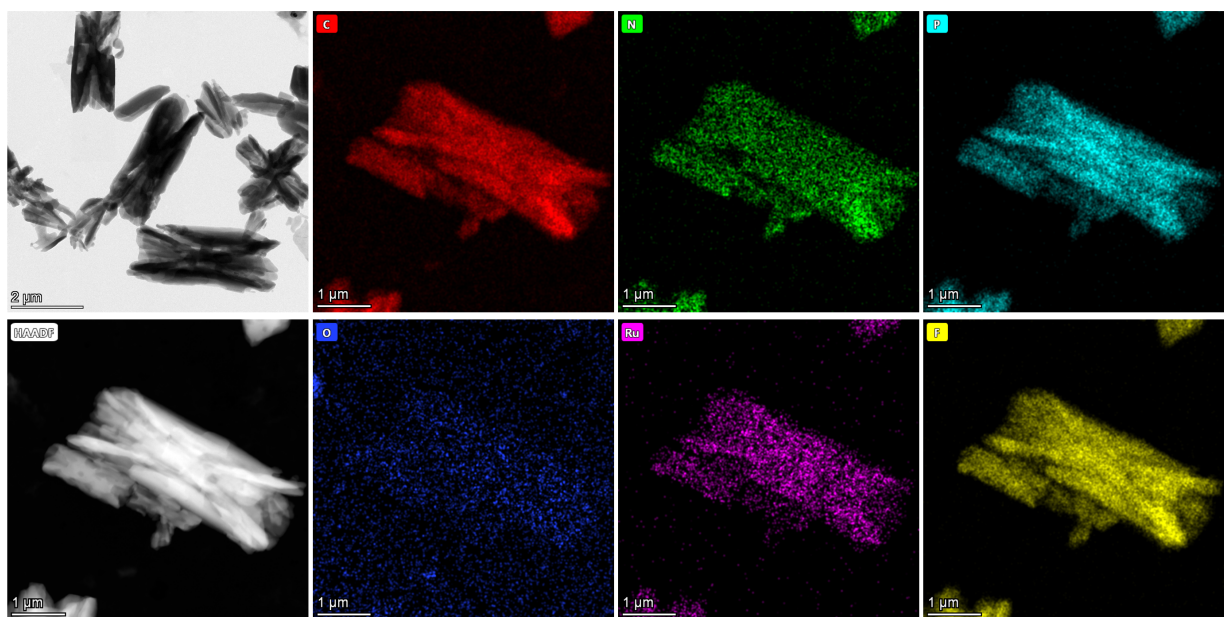

**Figure S9.** TEM, HAADF and elemental mapping (C-red, N-green, O-blue, P-cyan, F-yellow, Ru-pink) of the  $1.6\ \mu\text{m}$   $[\text{Ru}(\text{bpy})_3](\text{PF}_6)_2$  microparticles prepared by fast precipitation at  $0\ ^\circ\text{C}$ .

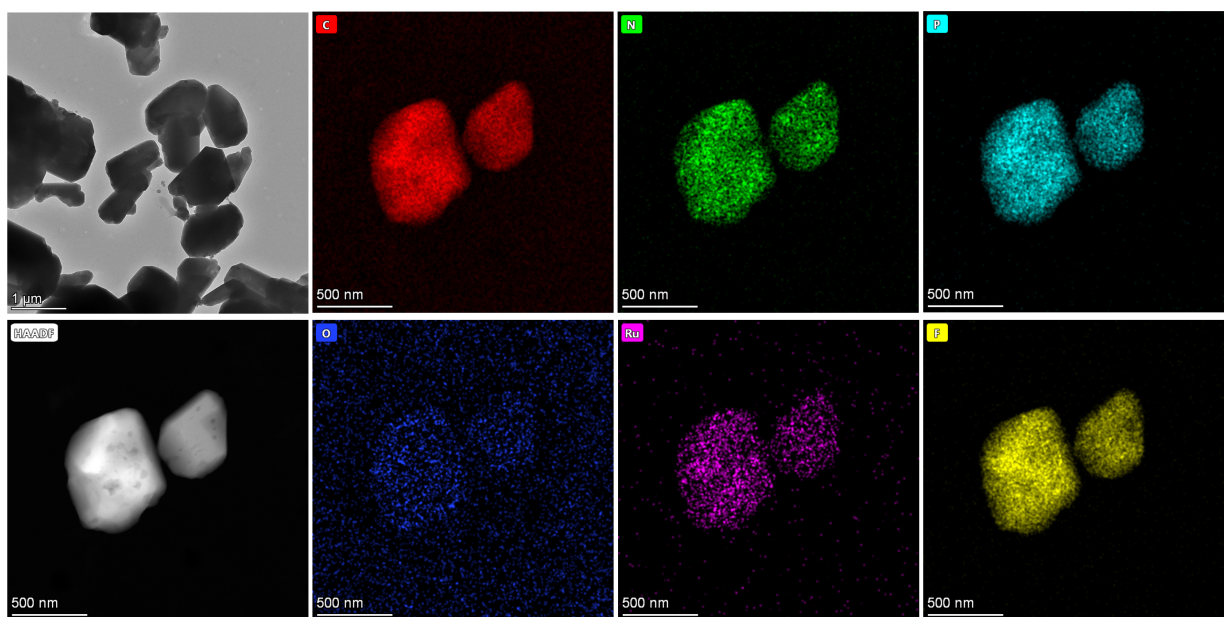

**Figure S10.** TEM, HAADF and elemental mapping (C-red, N-green, O-blue, P-cyan, F-yellow, Ru-pink) of the  $0.8\ \mu\text{m}$   $[\text{Ru}(\text{bpy})_3](\text{PF}_6)_2$  microparticles prepared by fast precipitation at  $-75\ ^\circ\text{C}$ .

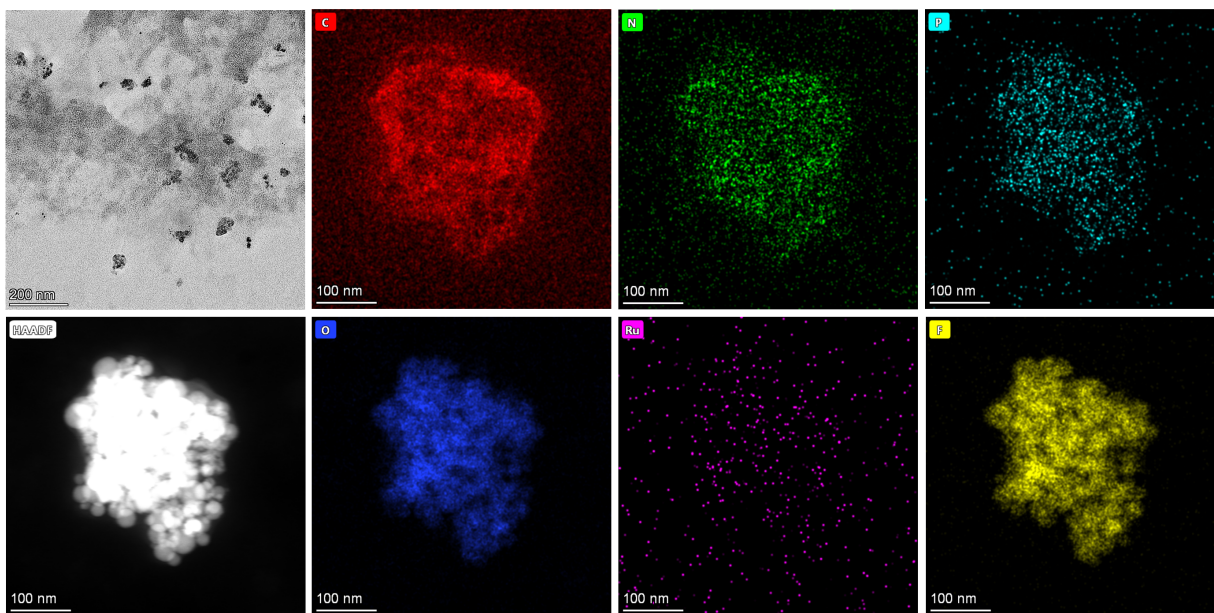

**Figure S11.** TEM, HAADF and elemental mapping (C-red, N-green, O-blue, P-cyan, F-yellow, Ru-pink) of the **40 nm PVP**  $[\text{Ru}(\text{bpy})_3](\text{PF}_6)_2$  nanoparticles prepared by fast precipitation at room temperature in the presence of PVP55 confining agent.

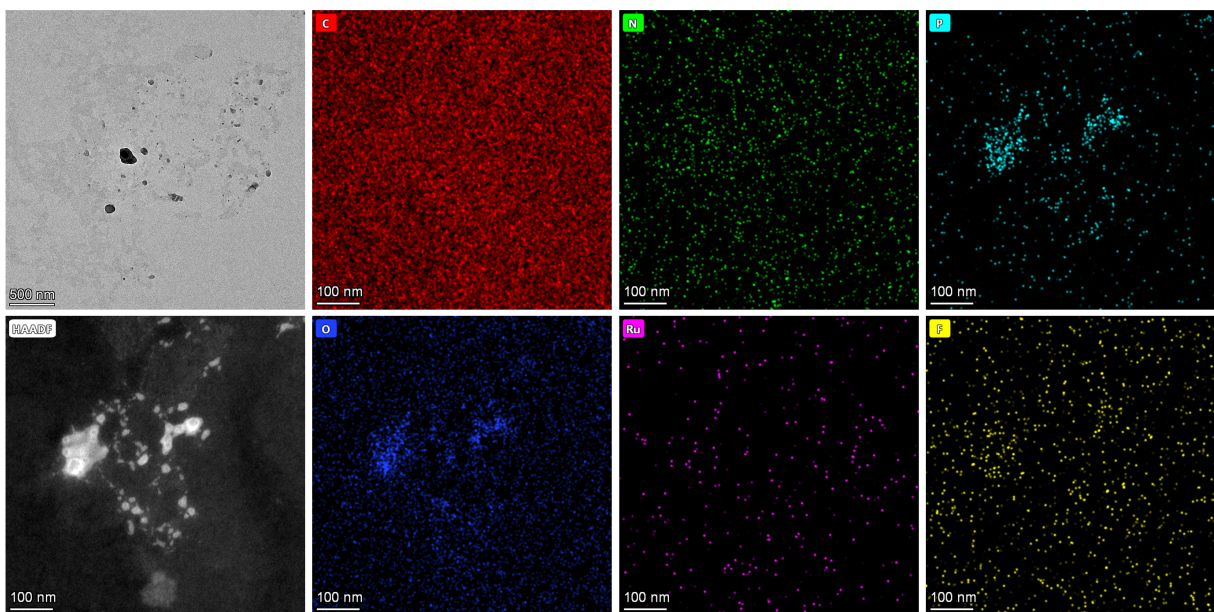

**Figure S12.** TEM, HAADF and elemental mapping (C-red, N-green, O-blue, P-cyan, F-yellow, Ru-pink) of the **20 nm PEG**  $[\text{Ru}(\text{bpy})_3](\text{PF}_6)_2$  nanoparticles prepared by fast precipitation at room temperature in the presence of PEG6000 confining agent.

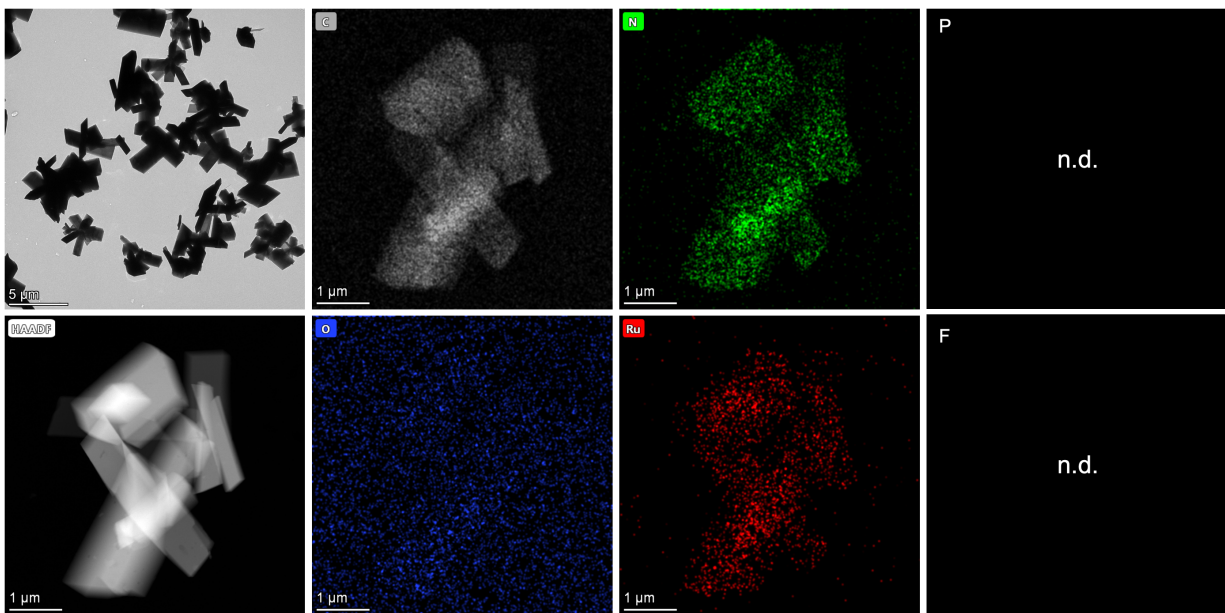

**Figure S13.** TEM, HAADF and elemental mapping (C-red, N-green, O-blue, P-cyan, F-yellow, Ru-pink) of the 3 μm [Ru(bpy)<sub>2</sub>(dmbpy)](PF<sub>6</sub>)<sub>2</sub> microparticles prepared by fast precipitation at 0 °C (n.d. = not determined).

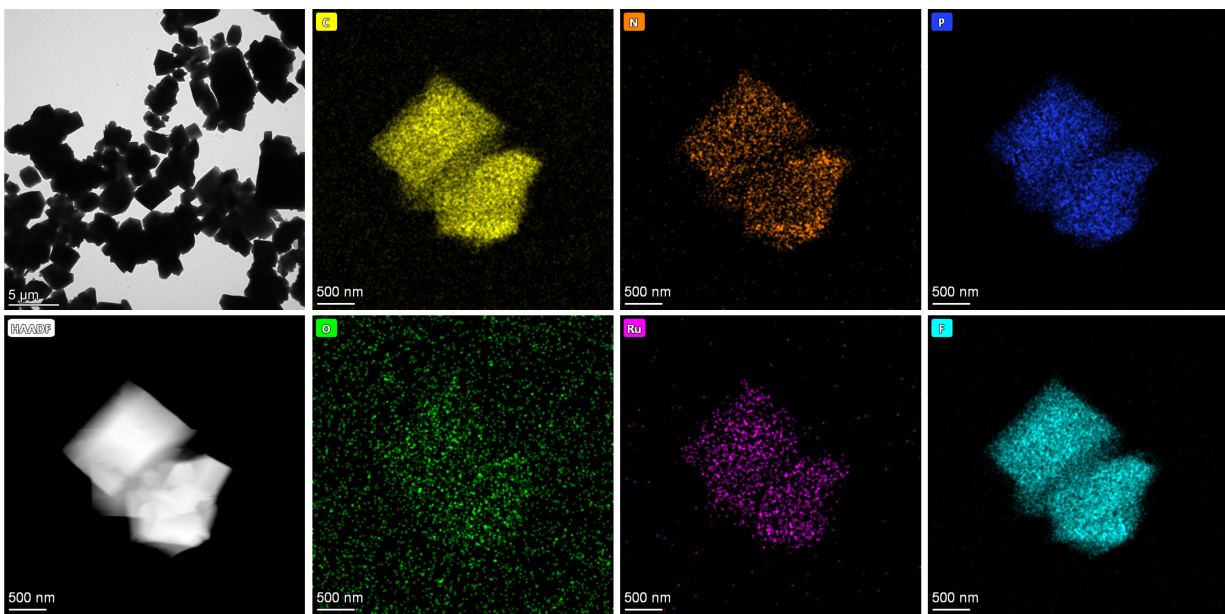

**Figure S14.** TEM, HAADF and elemental mapping (C-red, N-green, O-blue, P-cyan, F-yellow, Ru-pink) of the 1 μm [Ru(bpy)<sub>2</sub>(dmbpy)](PF<sub>6</sub>)<sub>2</sub> microparticles prepared by fast precipitation at 0 °C.



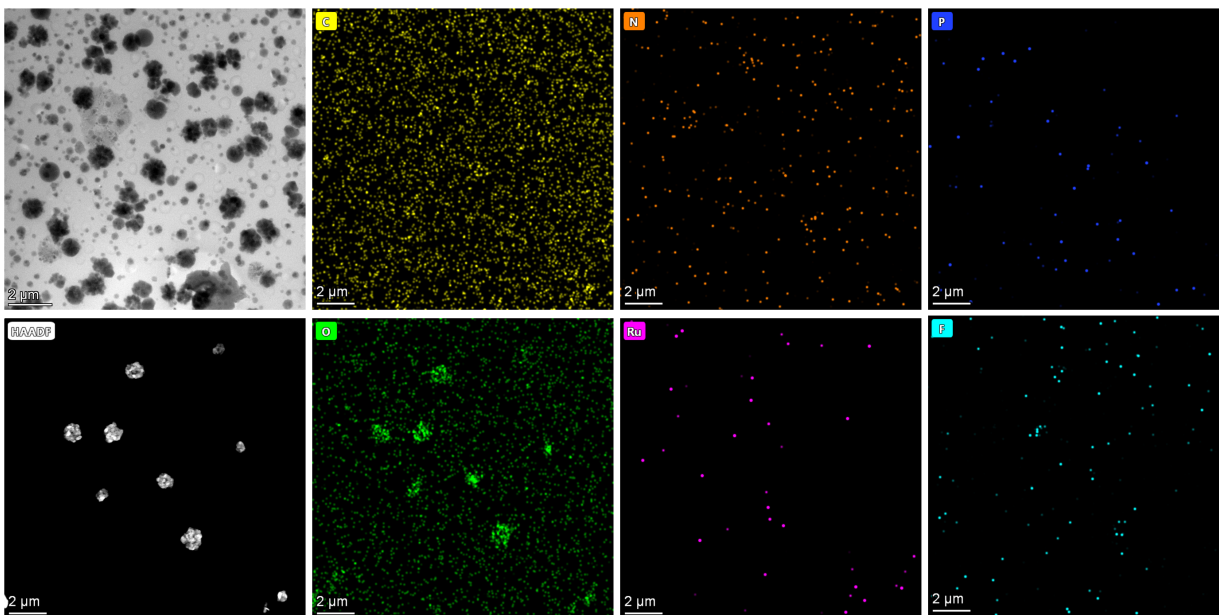

**Figure S15.** TEM, HAADF and elemental mapping (C-red, N-green, O-blue, P-cyan, F-yellow, Ru-pink) of the **380 nm PVP**  $[\text{Ru}(\text{bpy})_2(\text{dmbpy})](\text{PF}_6)_2$  nanoparticles prepared by fast precipitation at room temperature in the presence of PVP55 confining agent.

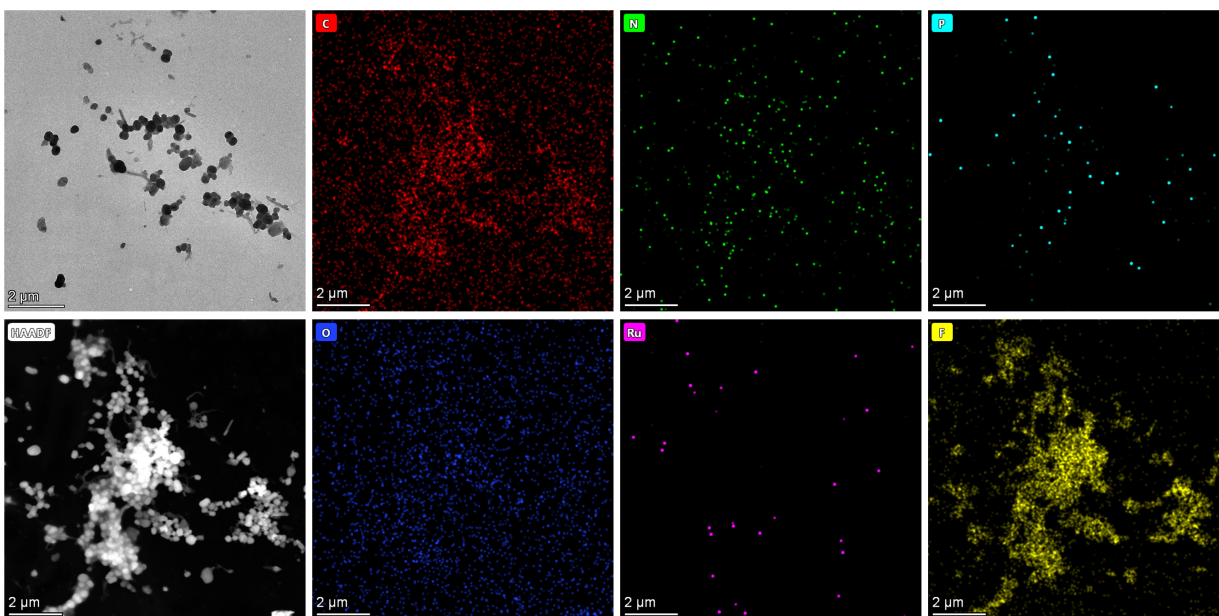

**Figure S16.** TEM, HAADF and elemental mapping (C-red, N-green, O-blue, P-cyan, F-yellow, Ru-pink) of the **300 nm PEG**  $[\text{Ru}(\text{bpy})_2(\text{dmbpy})](\text{PF}_6)_2$  nanoparticles prepared by fast precipitation at room temperature in the presence of PEG6000 confining agent.

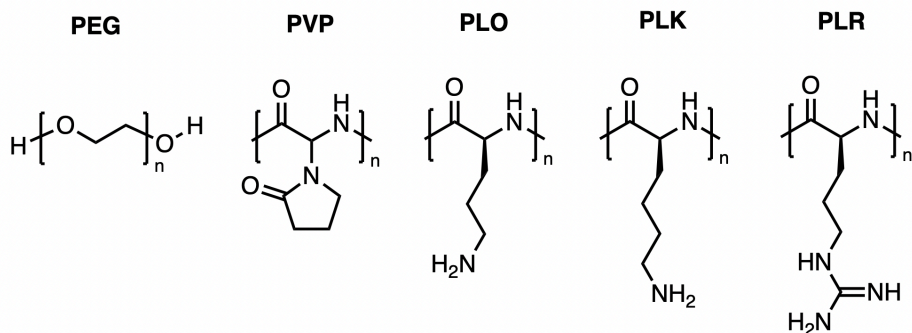

**Figure S17.** Chemical structures of polymers used in this study. PEG is polyethylene glycol; PVP is polyvinylpyrrolidone; PLO is poly(L-ornithine); PLK is poly(L-lysine); and PLR is poly(L-arginine).

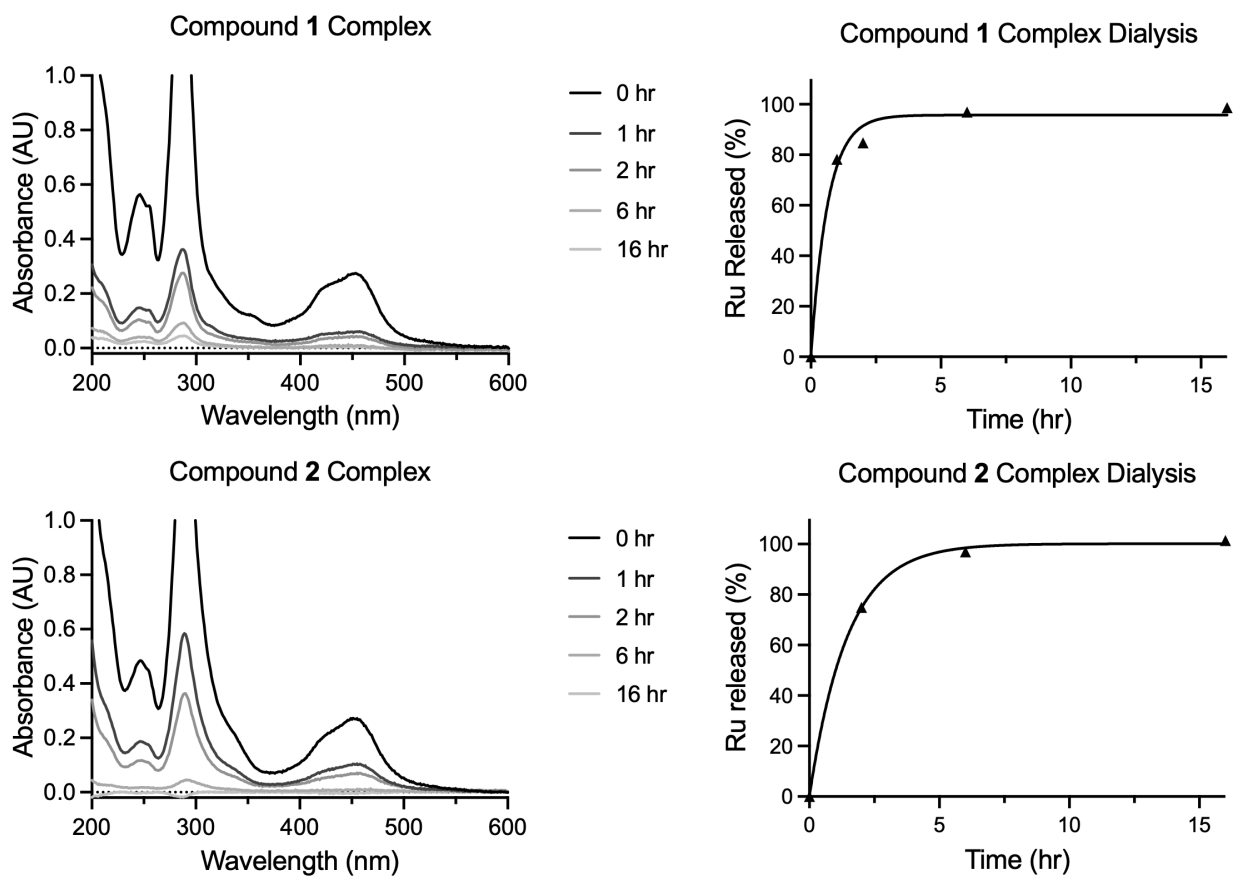

**Figure S18.** UV-Visible spectra as function of time of  $[\text{Ru}(\text{bpy})_3](\text{PF}_6)_2$  (top) and  $[\text{Ru}(\text{bpy})_2(\text{dmbpy})](\text{PF}_6)_2$  (bottom) solubilized complex in methanol dialyzed in water at 37°C in the dark.

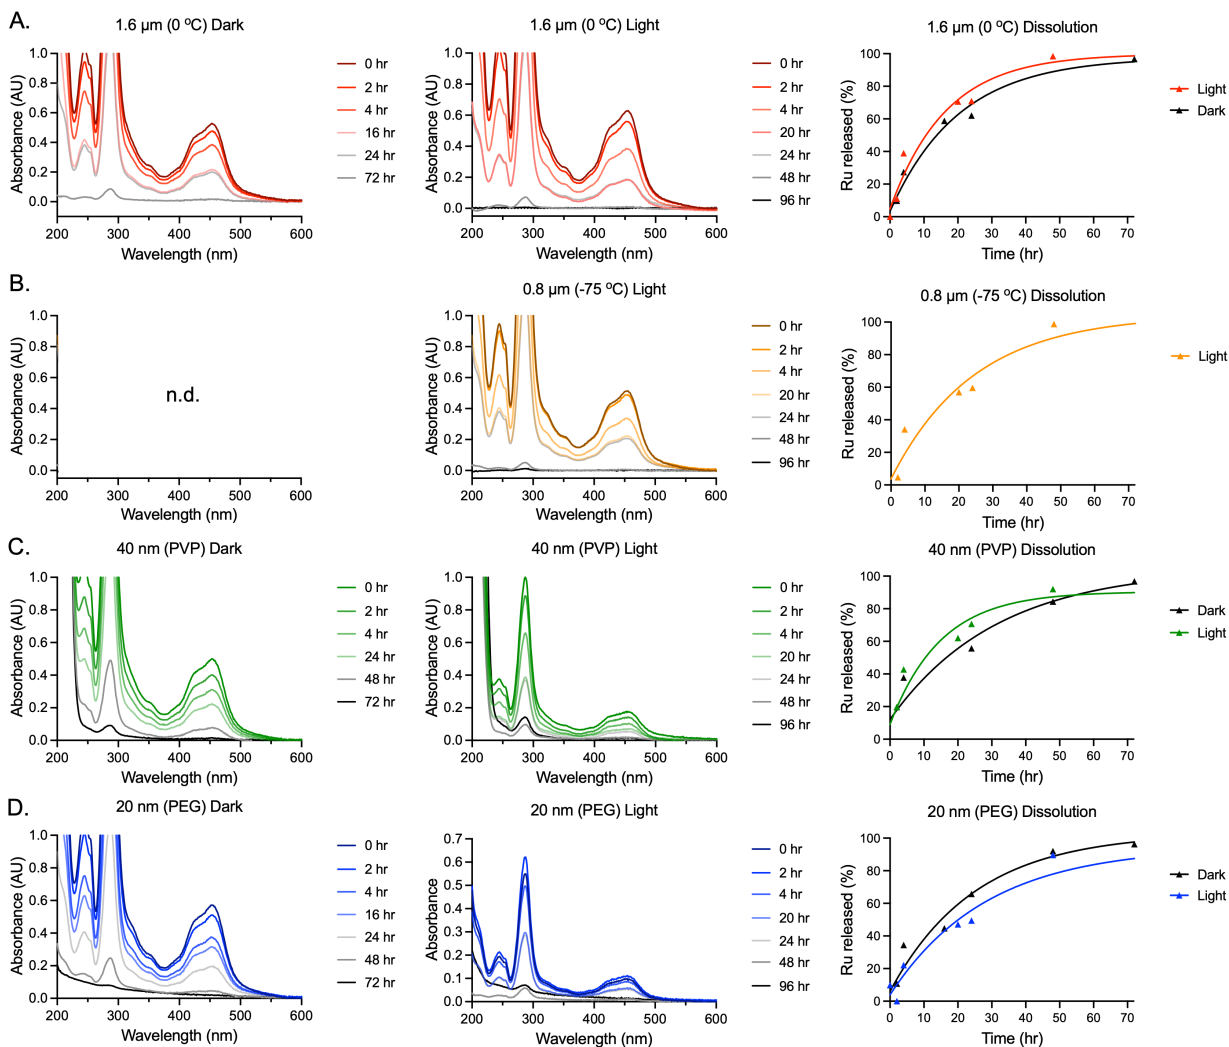

**Figure S19.** UV-Visible spectra as function of time of  $[\text{Ru}(\text{bpy})_3](\text{PF}_6)_2$  (A) 1.6  $\mu\text{m}$ , (B) 0.8  $\mu\text{m}$ , (C) 40 nm PVP and (D) 20 nm PEG particles PBS suspension ( $\sim 1 \text{ mg/mL}$ ) dialyzed in water at  $37^\circ\text{C}$  in the dark or after light activation ( $t = 1 \text{ min}$ ,  $\lambda = 450 \text{ nm}$ ,  $P = 29.1 \text{ J/cm}^2$ ) (n.d. = not determined).

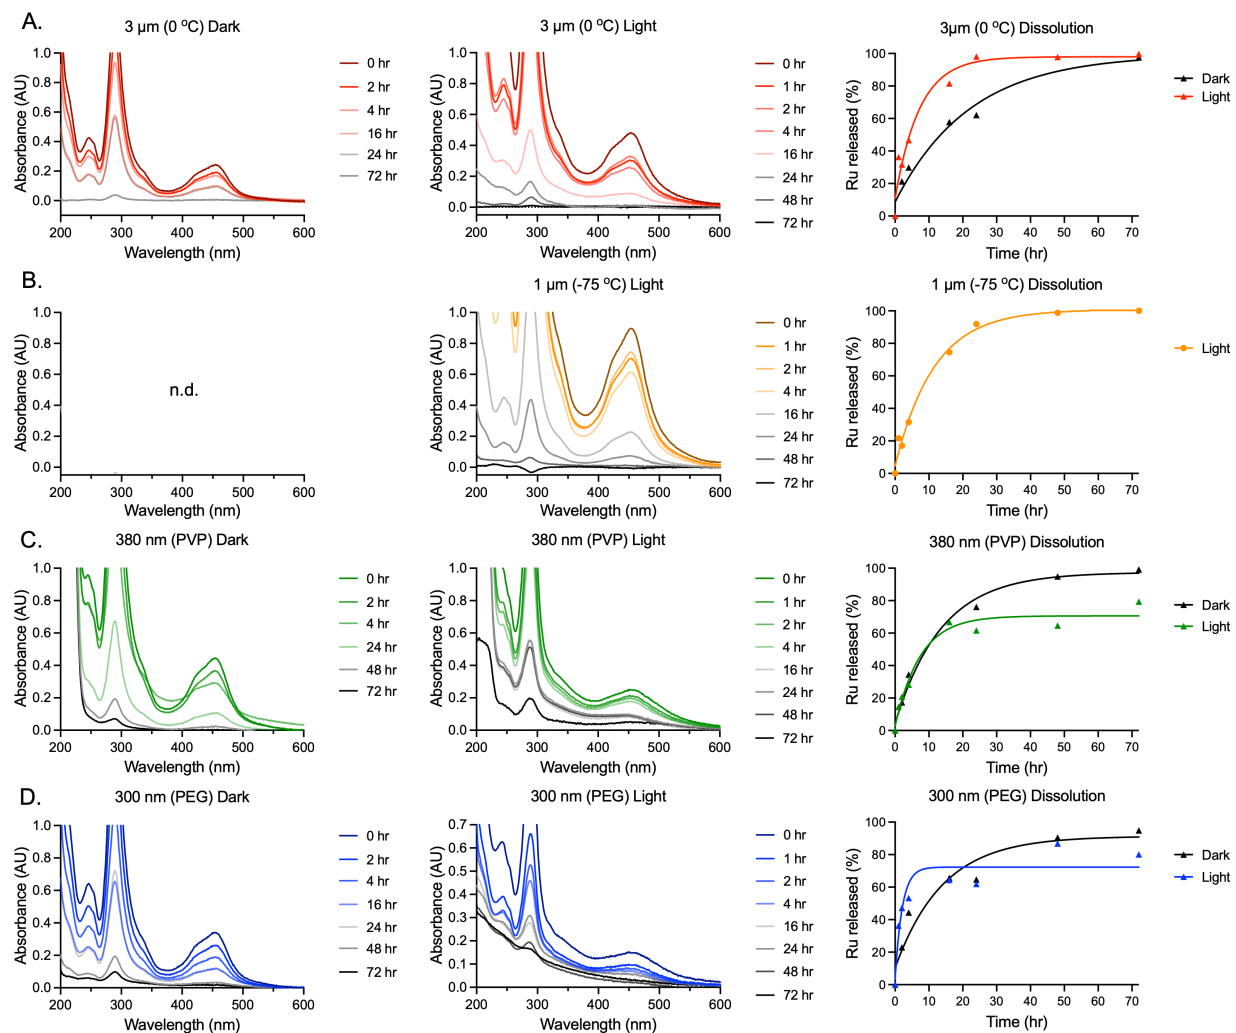

**Figure S20.** UV-Visible spectra as function of time of  $[\text{Ru}(\text{bpy})_2(\text{dmbpy})](\text{PF}_6)_2$  (A) 3  $\mu\text{m}$ , (B) 1  $\mu\text{m}$ , (C) 380 nm PVP and (D) 300 nm PEG particles PBS suspension ( $\sim 1$  mg/mL) dialyzed in water at 37 $^\circ\text{C}$  in the dark or after light activation ( $t = 1$  min,  $\lambda = 450$  nm,  $P = 29.1$  J/cm $^2$ ) (n.d. = not determined).

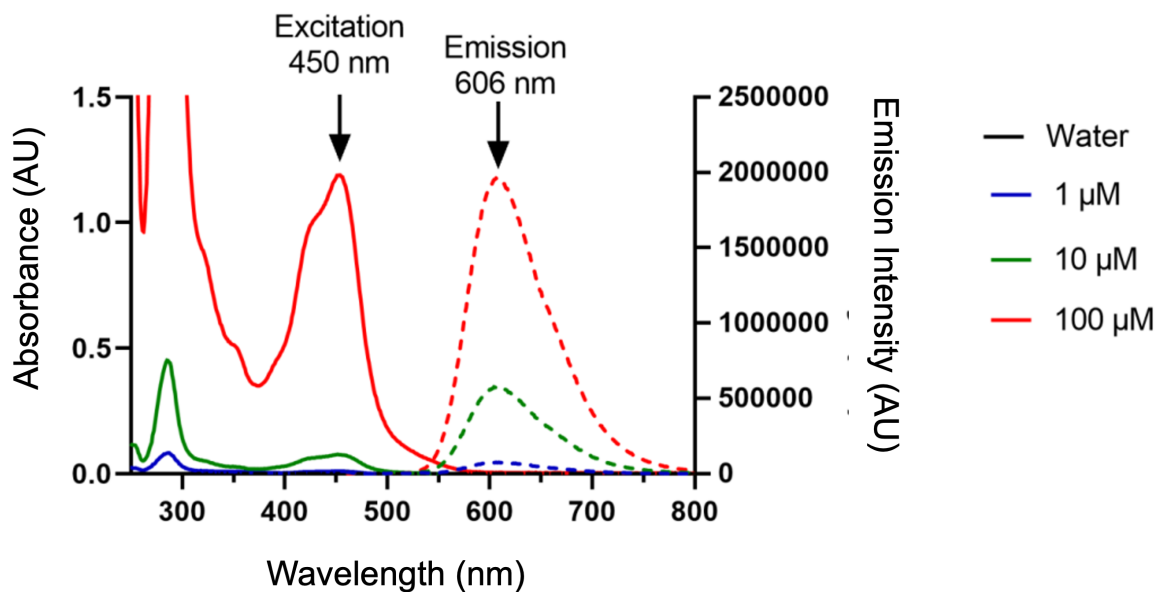

**Figure S21.** Excitation-emission properties of the  $[\text{Ru}(\text{bpy})_3]\text{Cl}_2$  complex in water and at different concentration.

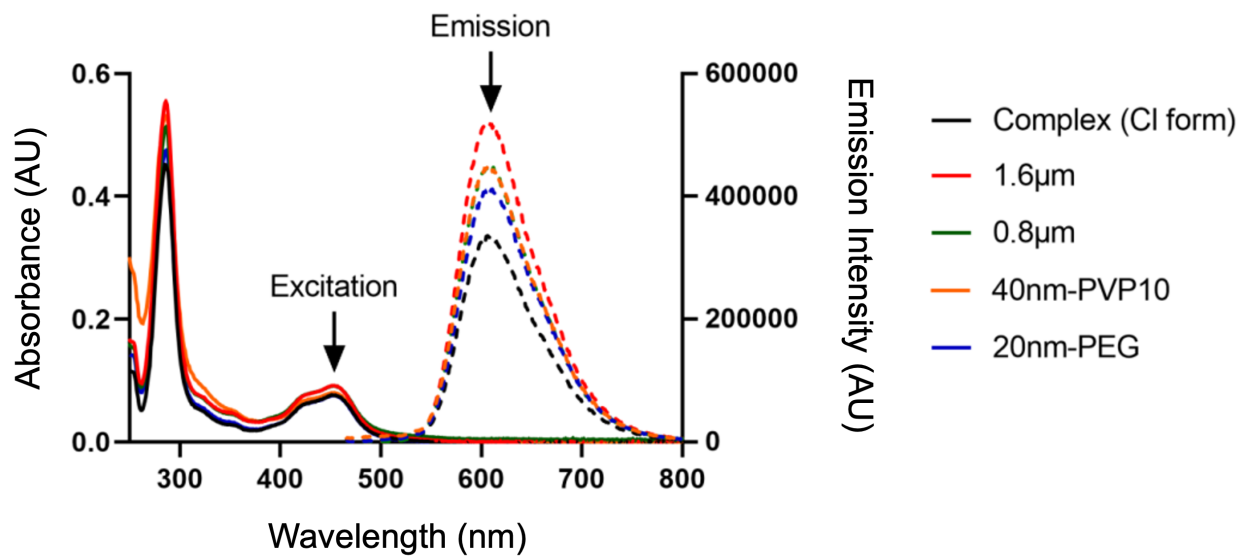

**Figure S22.** Excitation-emission properties of the  $[\text{Ru}(\text{bpy})_3](\text{PF}_6)_2$  particles compared to the solubilized complex (Cl form) in water (10  $\mu\text{M}$  suspensions).



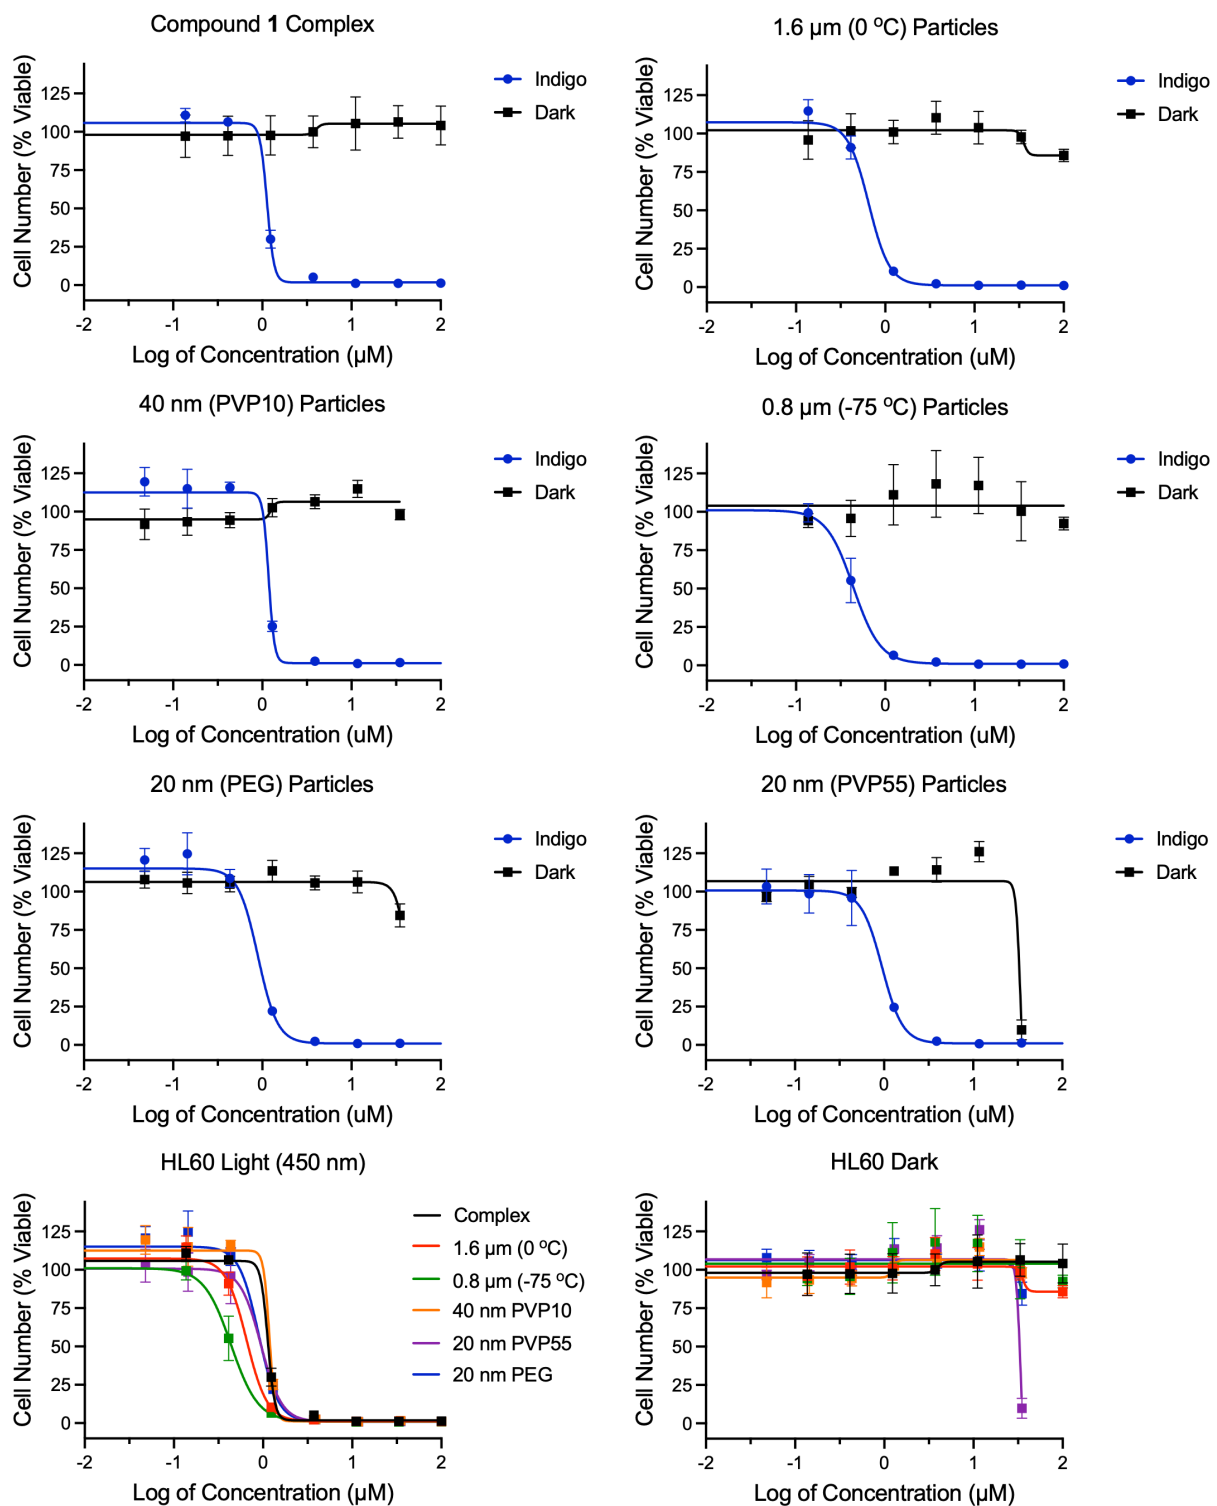

**Figure S23.** Cytotoxicity dose responses of compound 1 and associated particles in HL60 cells.

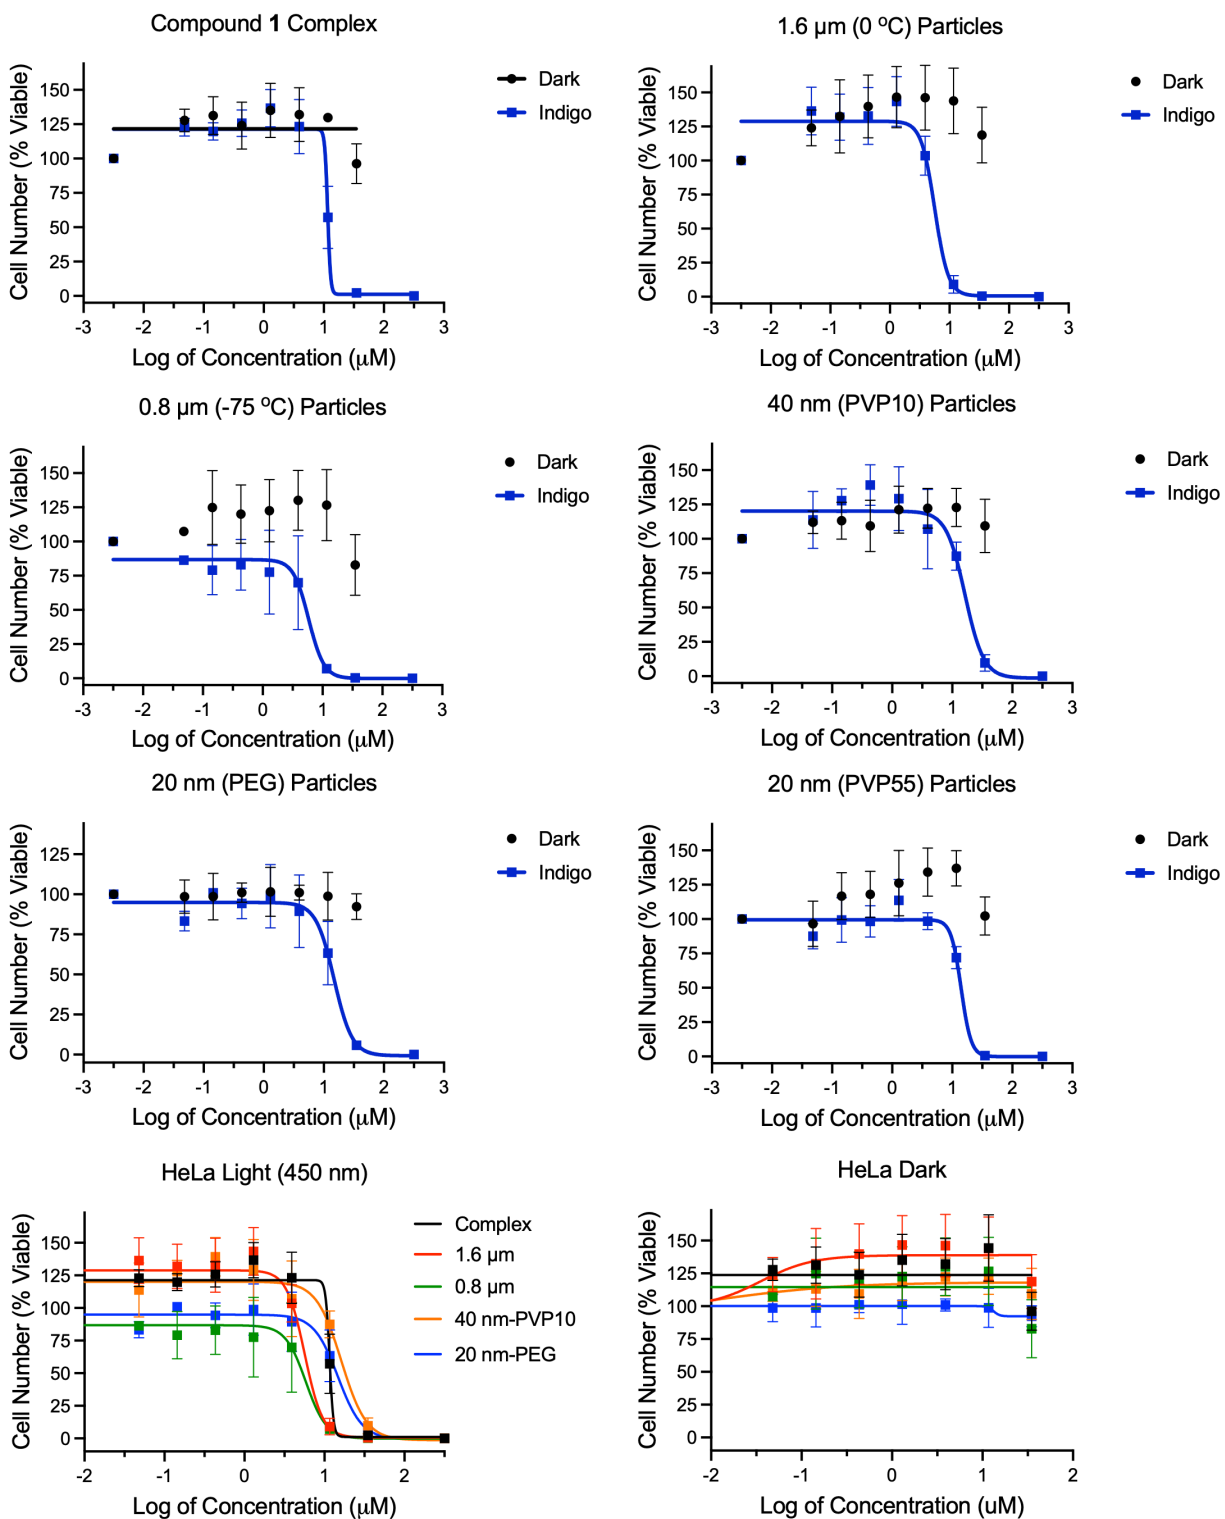

**Figure S24.** Cytotoxicity dose responses of compound 1 and associated particles in HeLa cells.

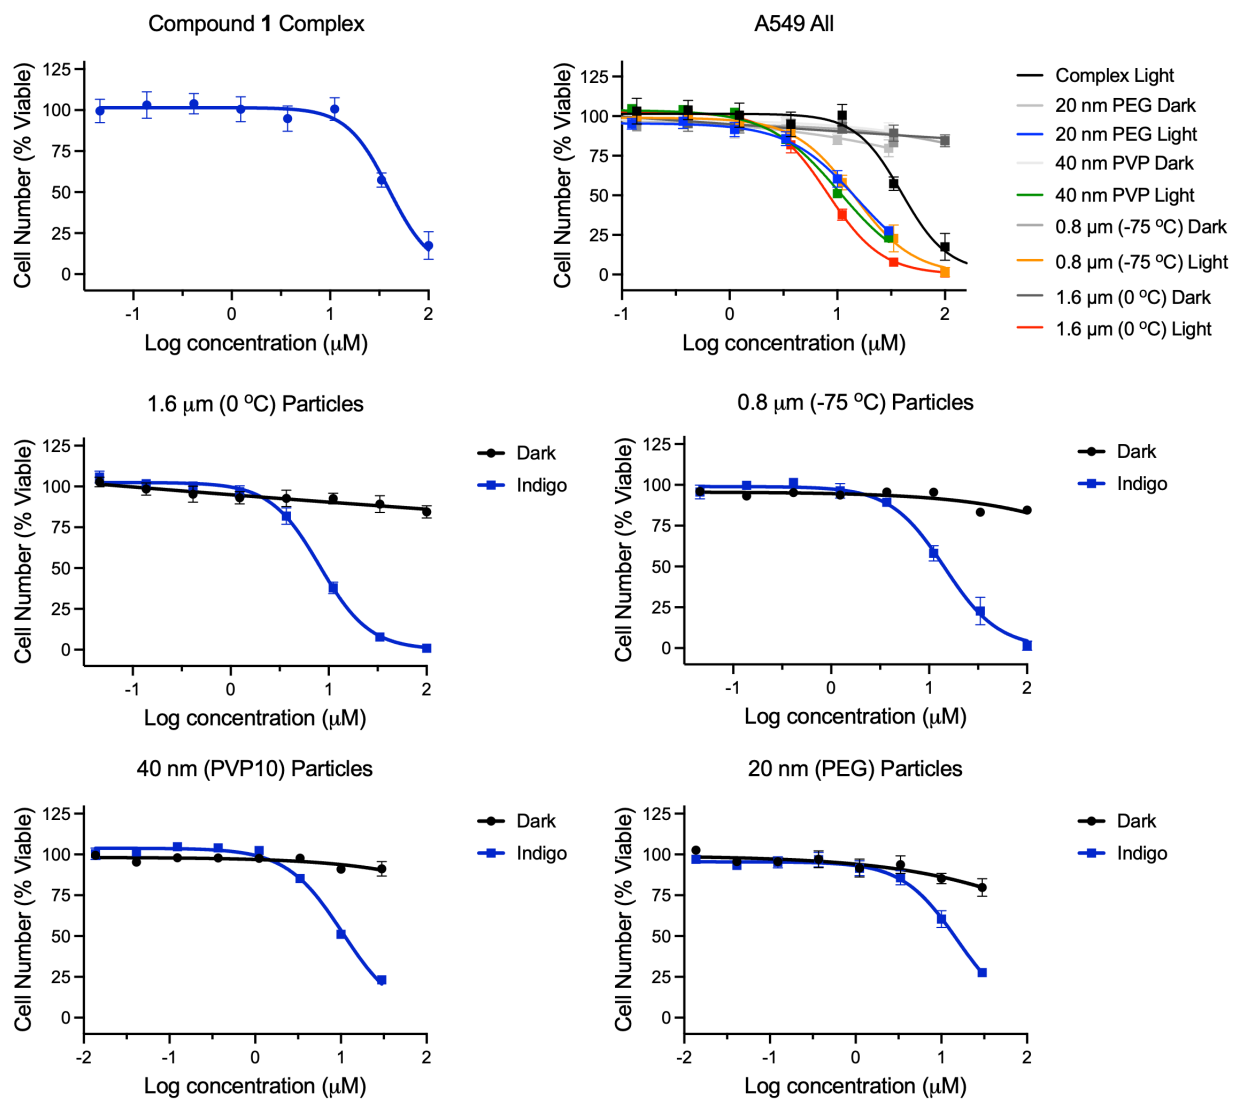

**Figure S25.** Cytotoxicity dose responses of compound **1** and associated particles in A549 cells.

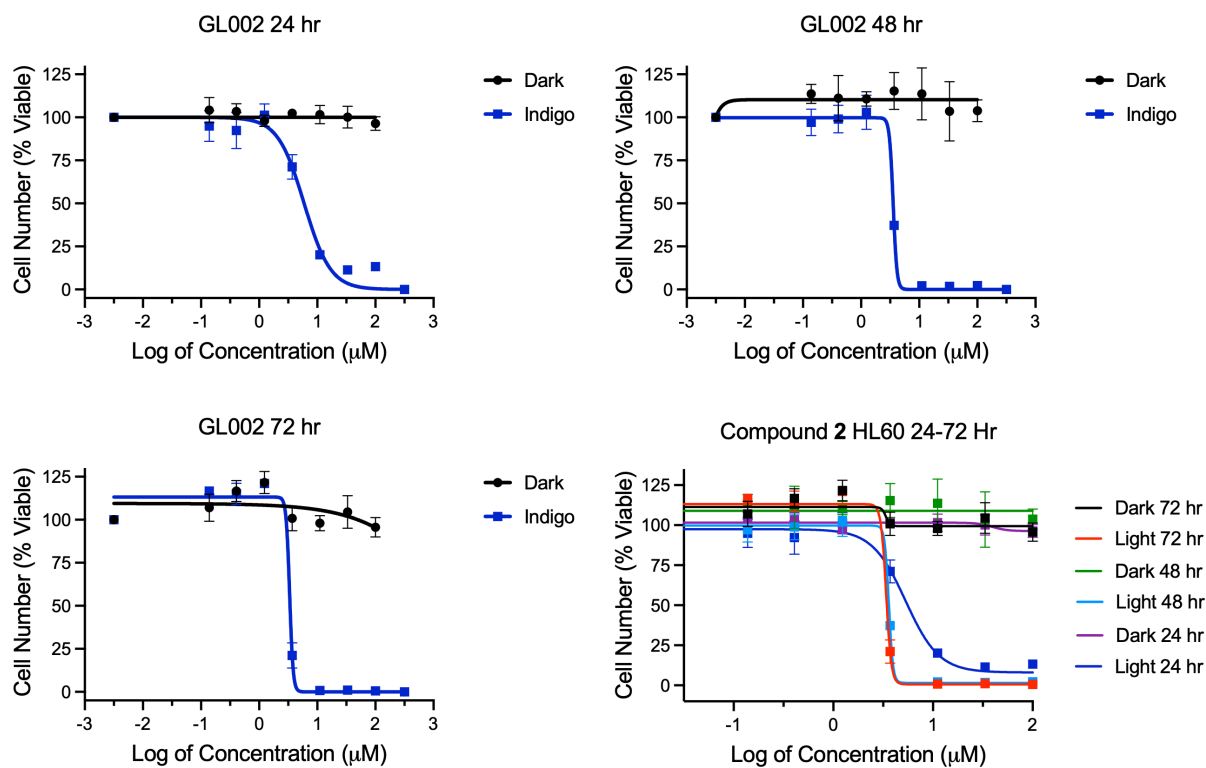

**Figure S26.** Cytotoxicity dose responses of compound 2 soluble complex with 24, 48, and 72 hour incubation following indigo light irradiation for 1 minute in HL60 cells.

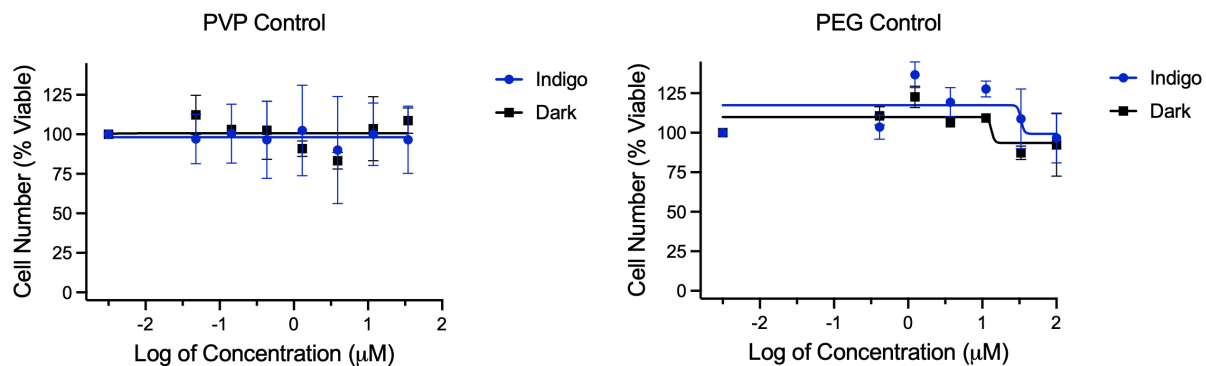

**Figure S27.** Cell viability of HL60 cells treated with PVP and PEG polymers.

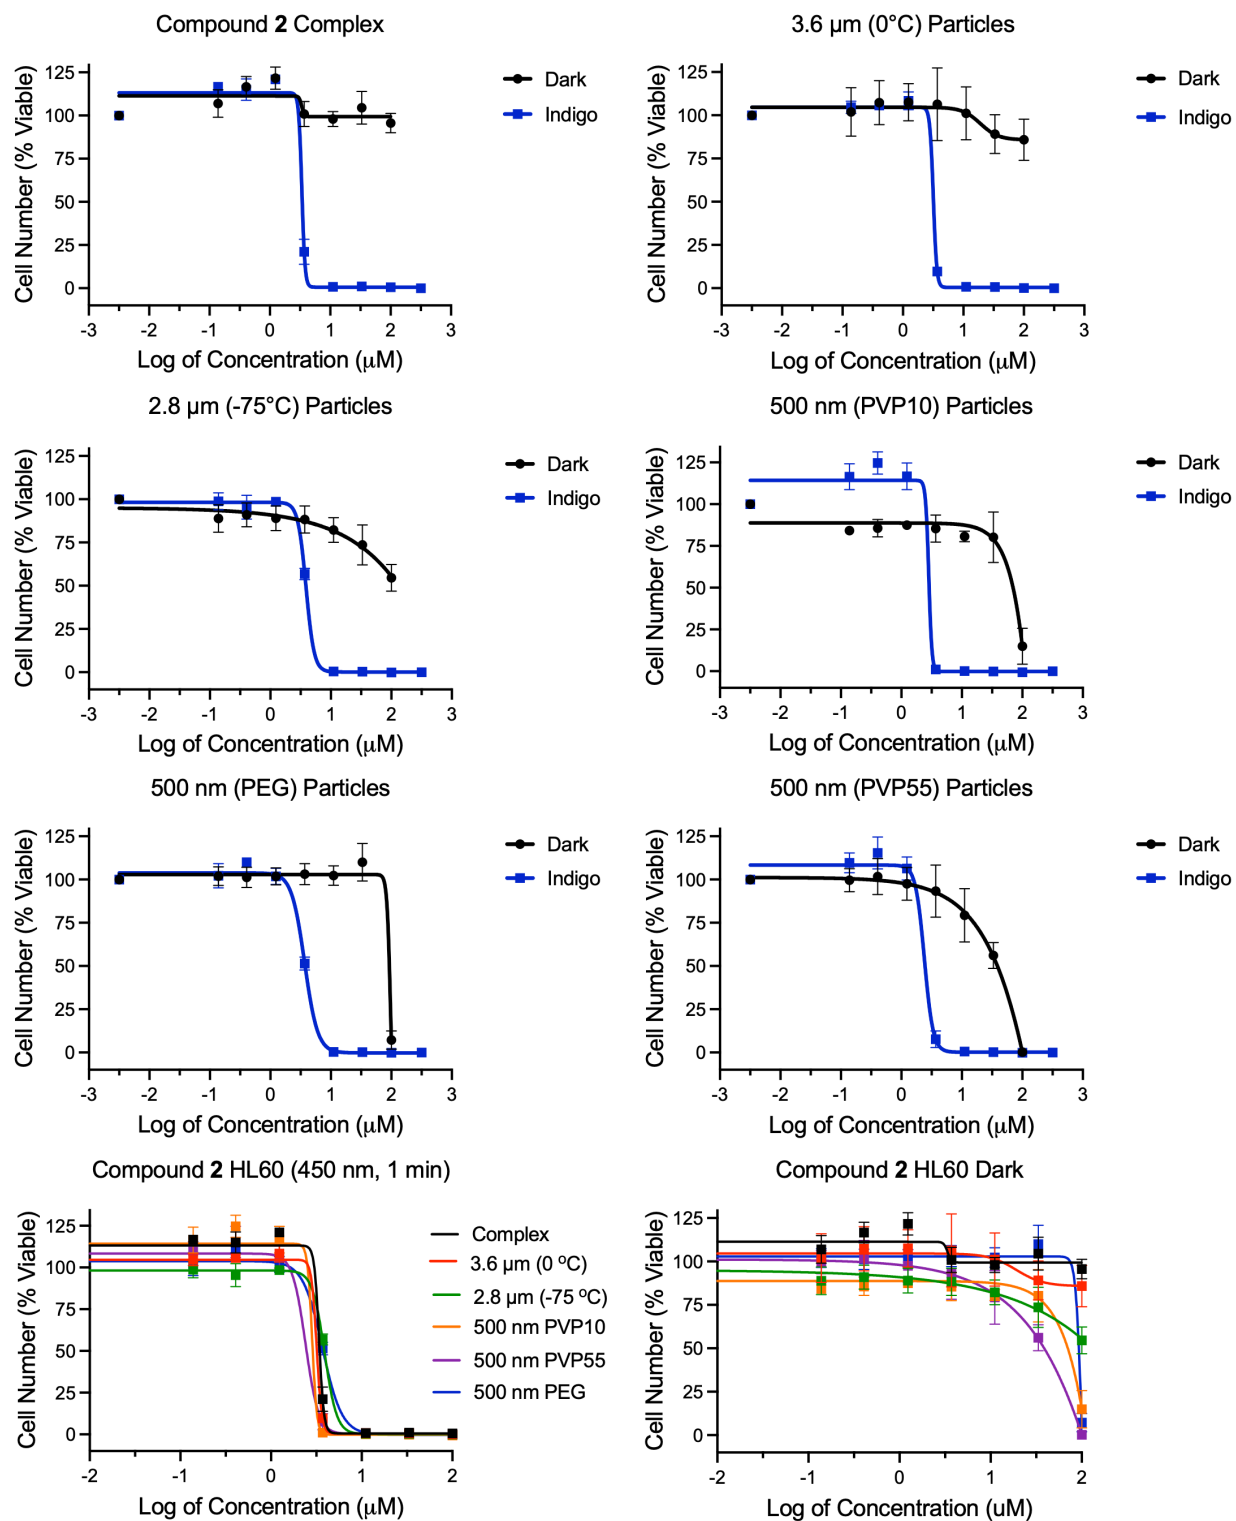

**Figure S28.** Cytotoxicity dose responses of compound 2 PF<sub>6</sub> and associated particles in HL60 cells.

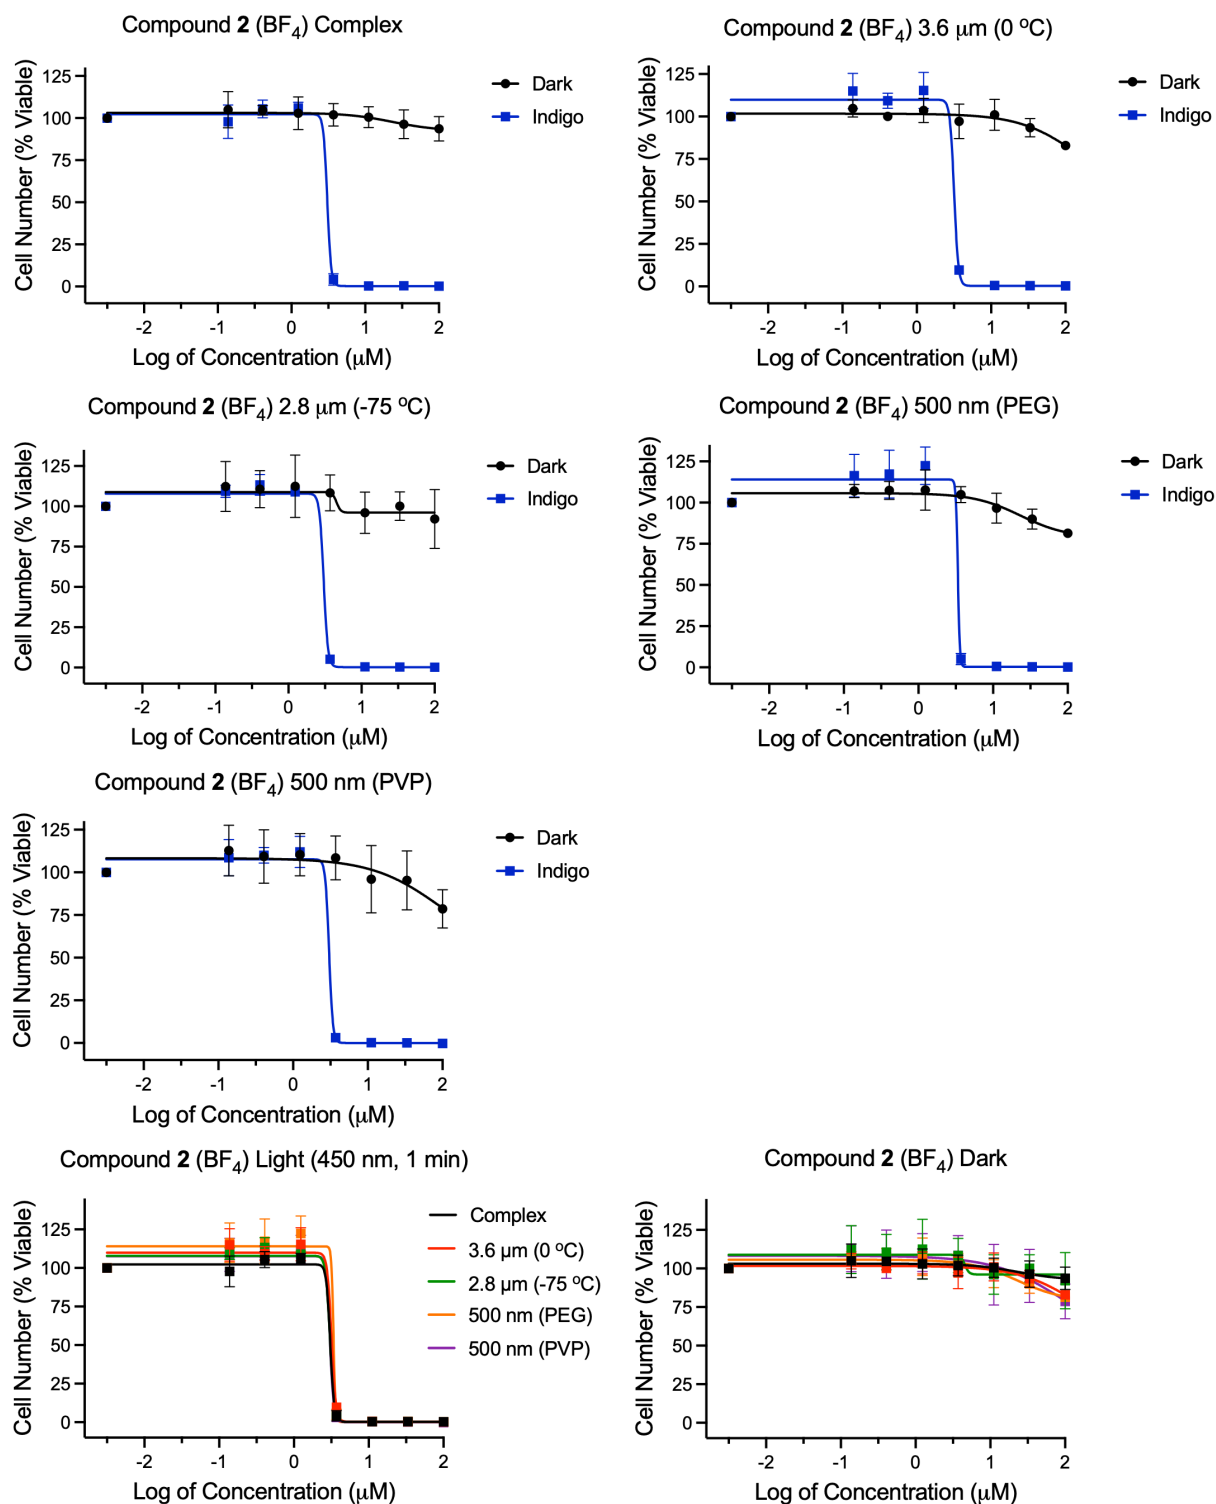

**Figure S29.** Cytotoxicity dose responses of compound 2  $\text{BF}_4$  and associated particles in HL60 cells.

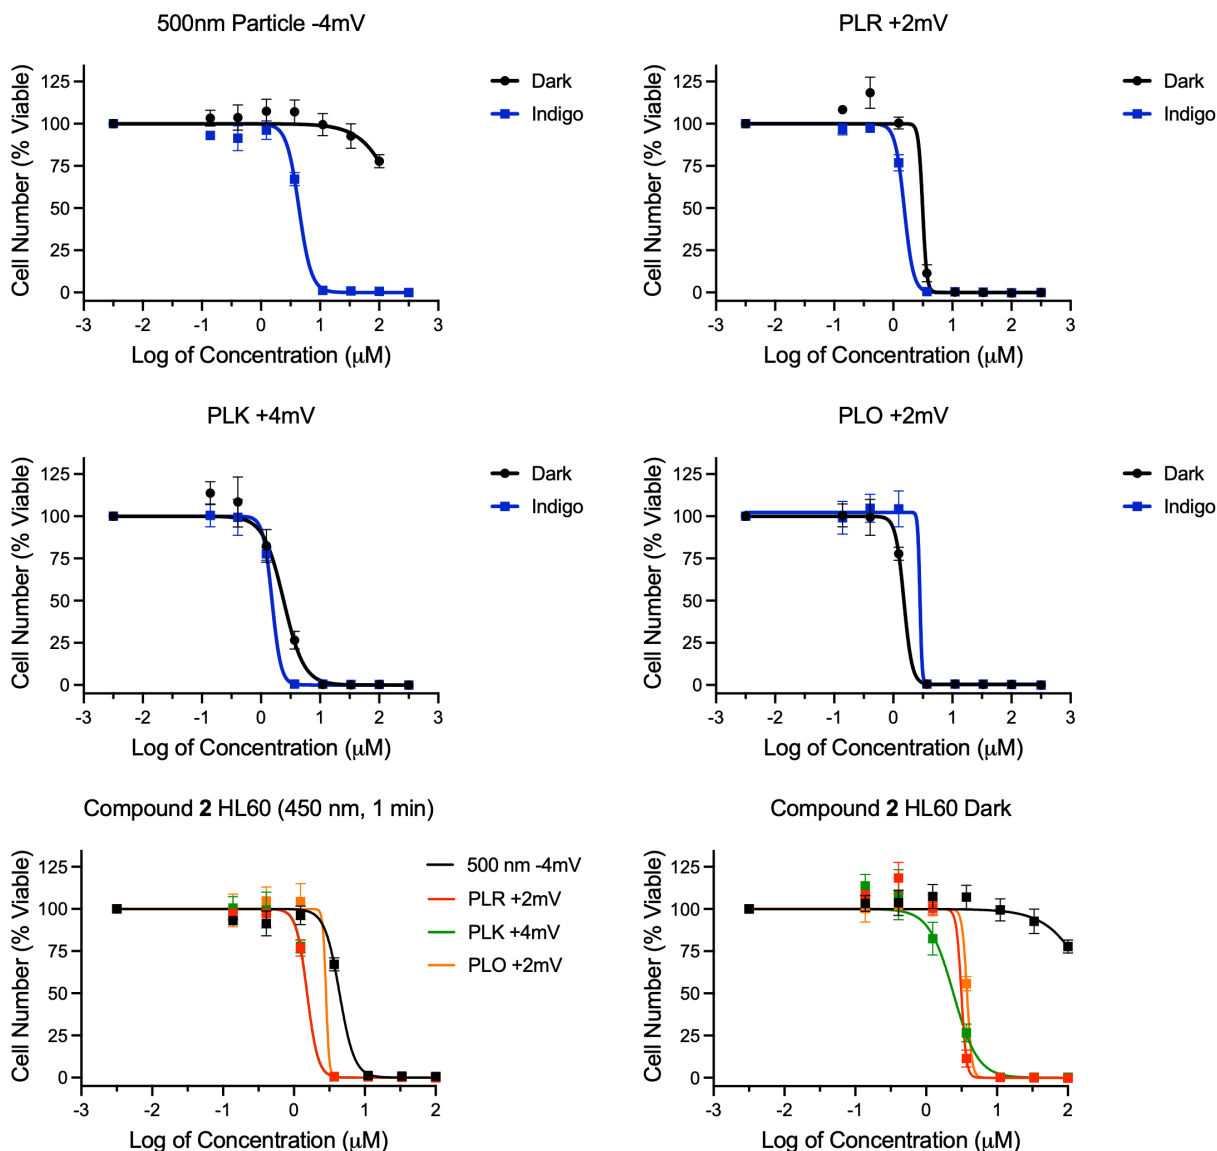

**Figure S30.** Cytotoxicity dose responses of 500 nm compound 2 post-functionalized with positively charge PLR, PLK, and PLO polymer in HL60 cells. The measures zeta potentials for 500 nm particles prepared with PLR, PLK, and PLO were +2 mV, +4 mV, and +2 mV, respectively. The uncoated 500 nm particles had a zeta potential of -4 mV, consistent with previous preparations.

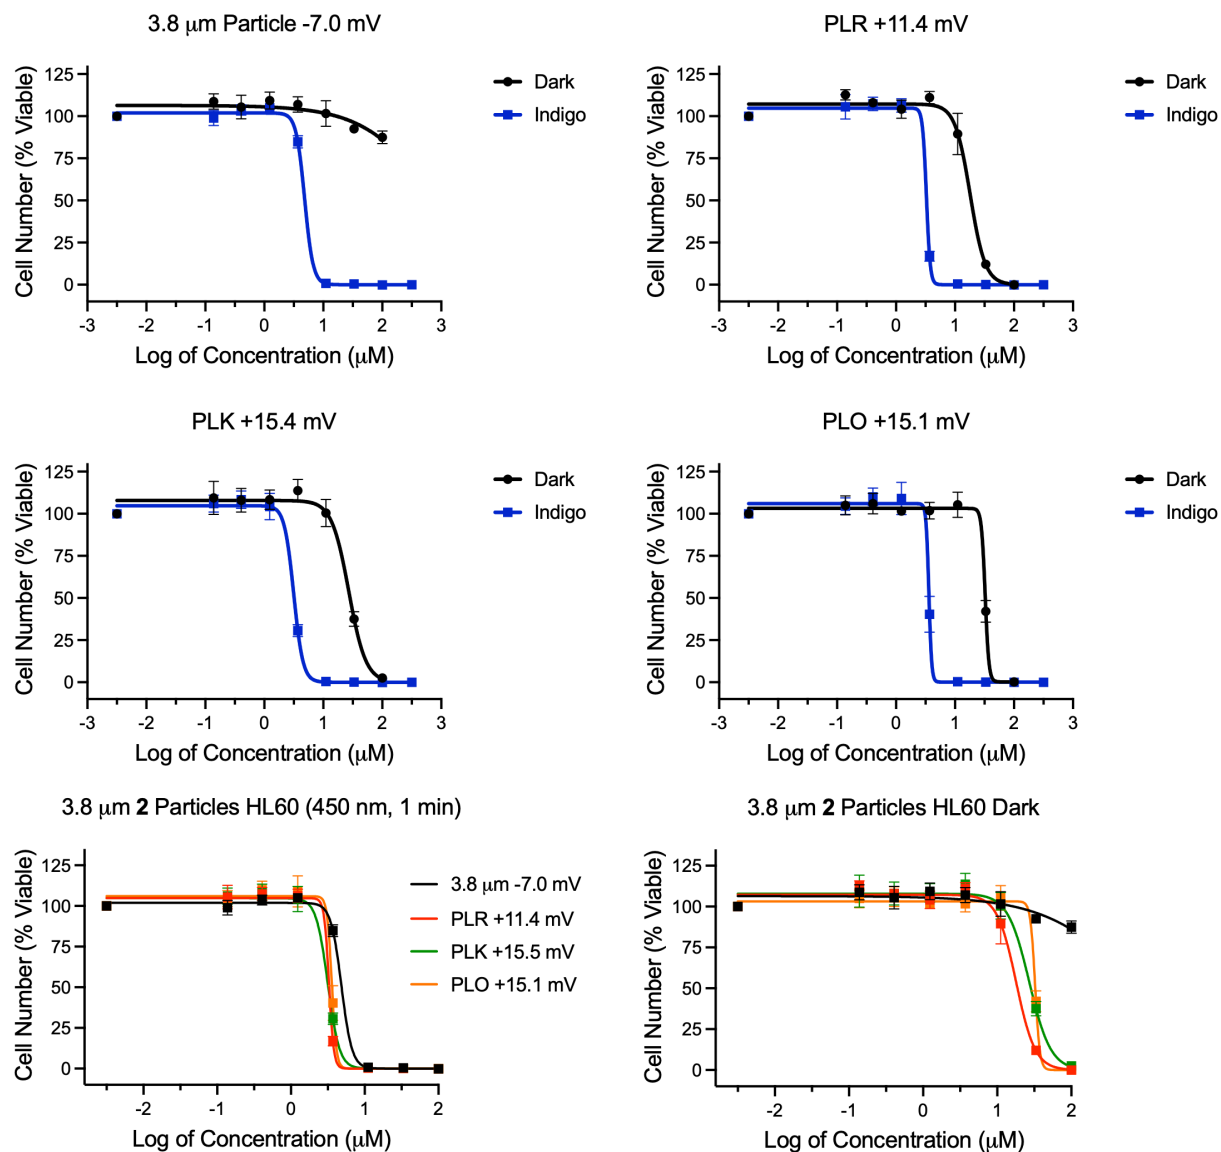

**Figure S31.** Cytotoxicity dose responses of 3.8  $\mu\text{m}$  compound 2 post-functionalized with positively charge PLR, PLK, and PLO polymer in HL60 cells. The measures zeta potentials for 3.8  $\mu\text{m}$  particles prepared with PLR, PLK, and PLO were +11.4 mV, +15.4 mV, and +15.1 mV, respectively. The uncoated 3.8  $\mu\text{m}$  particles had a zeta potential of -7 mV, consistent with previous preparations.



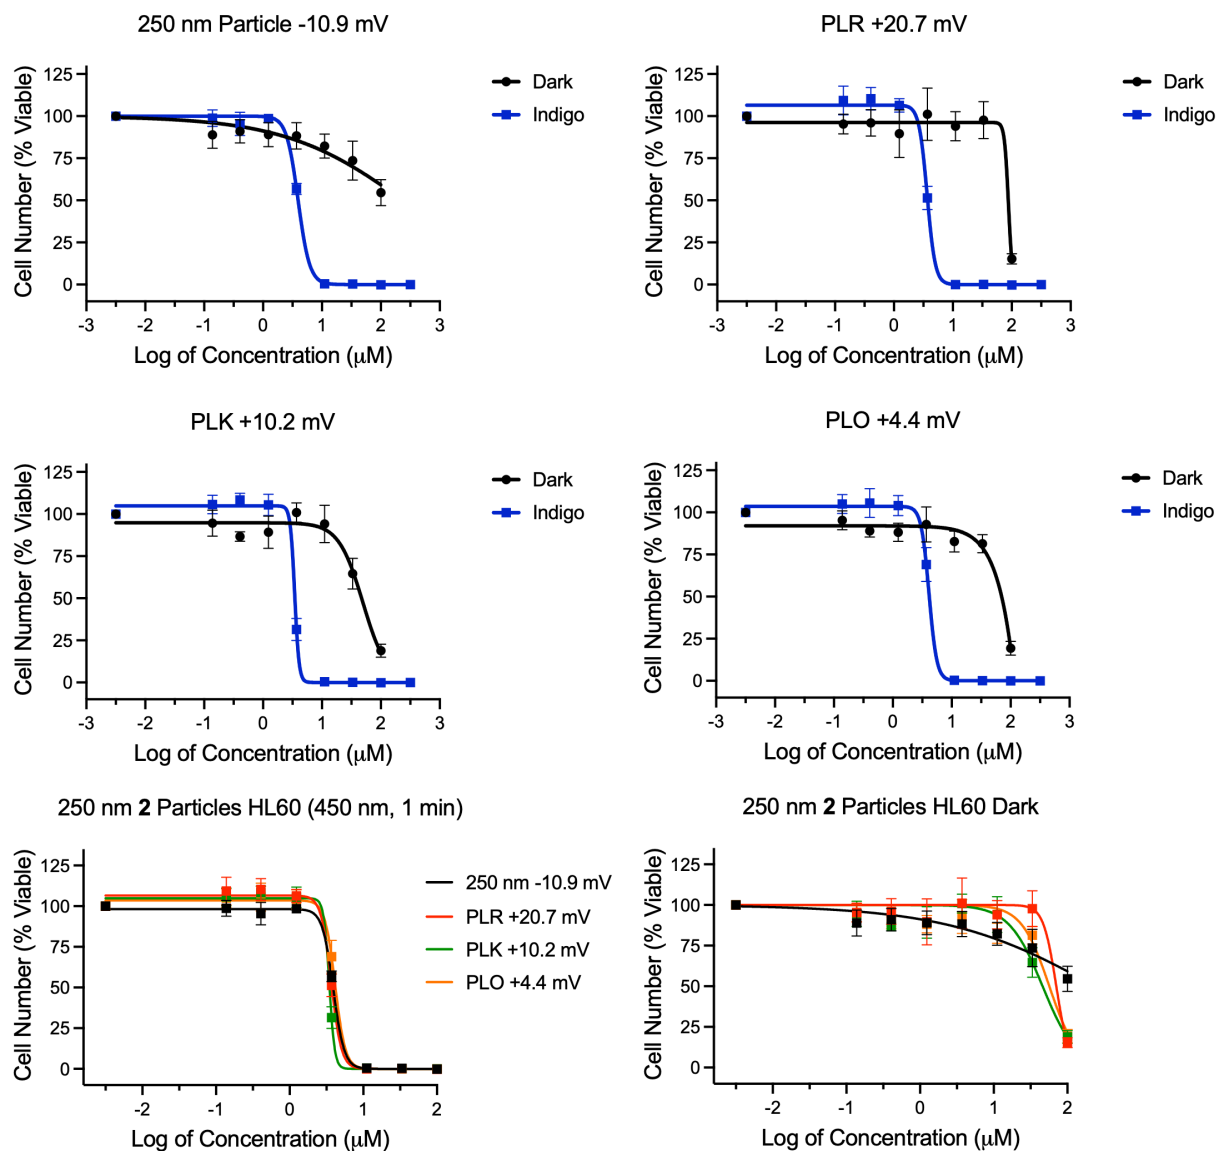

**Figure S32.** Cytotoxicity dose responses of **250 nm** compound **2** post-functionalized with positively charged PLR, PLK, and PLO polymer in HL60 cells. The measures zeta potentials for 250 nm particles prepared with PLR, PLK, and PLO were +20.7 mV, +10.2 mV, and +4.4 mV, respectively. The uncoated 250 nm particles had a zeta potential of -10.9 mV, consistent with previous preparations.

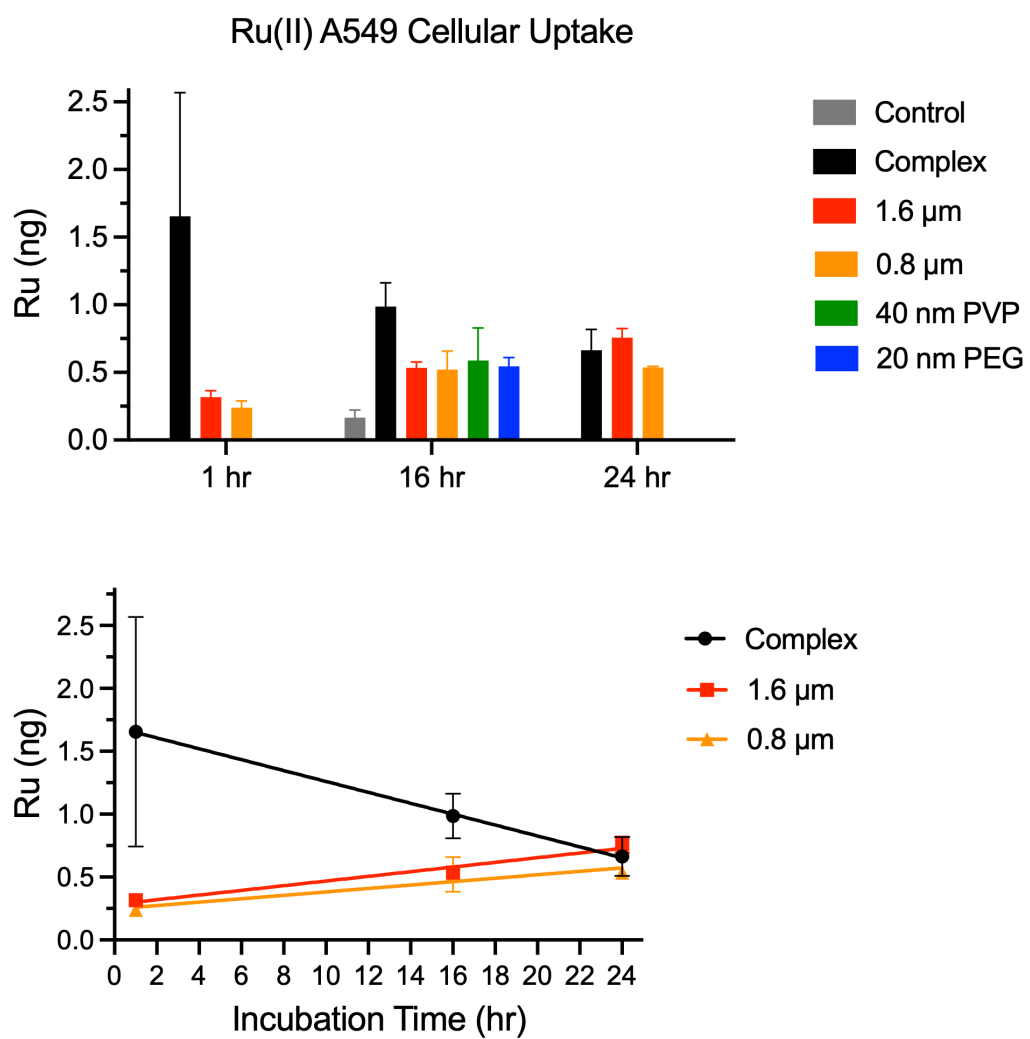

**Figure S33.** Accumulation of Ru in A549 cells at 1, 16, and 24 hours for compound **1** and associated particles (top) and the change in intracellular Ru content over time fitted with a linear regression (bottom).

A. Compound **1** 40 nm PVP10 Particles

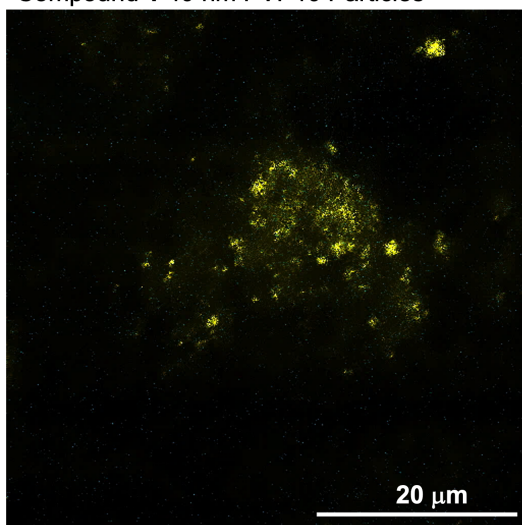

B. Compound **1** 1.6  $\mu\text{m}$  Particles (Z-Stack)

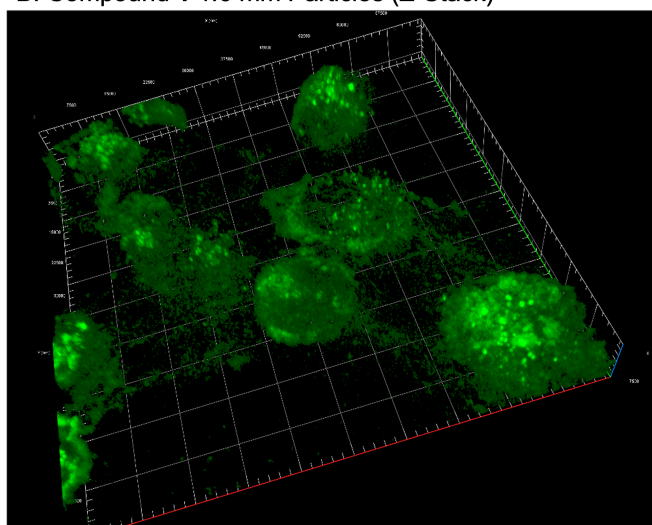

C.

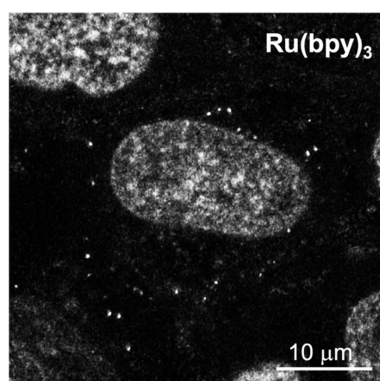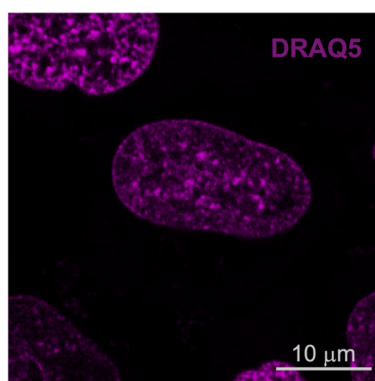

D.

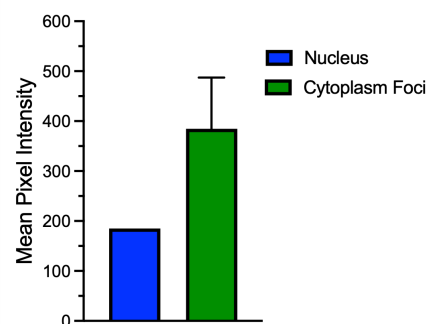

**Figure S34.** Fluorescence localization microscopy of compound **1** particles. (A) 40 nm PVP10 nanoparticles and released complex; (B) z-stack 3D rendering of 1.6  $\mu\text{m}$  particles; (C) single plane image of 1.6  $\mu\text{m}$  particles microparticles and released complex (left) and DRAQ5 nuclear stain (right); (D) plot of mean pixel intensity of  $\text{Ru}(\text{bpy})_3$  signal in the nucleus versus foci located in the cytoplasm.

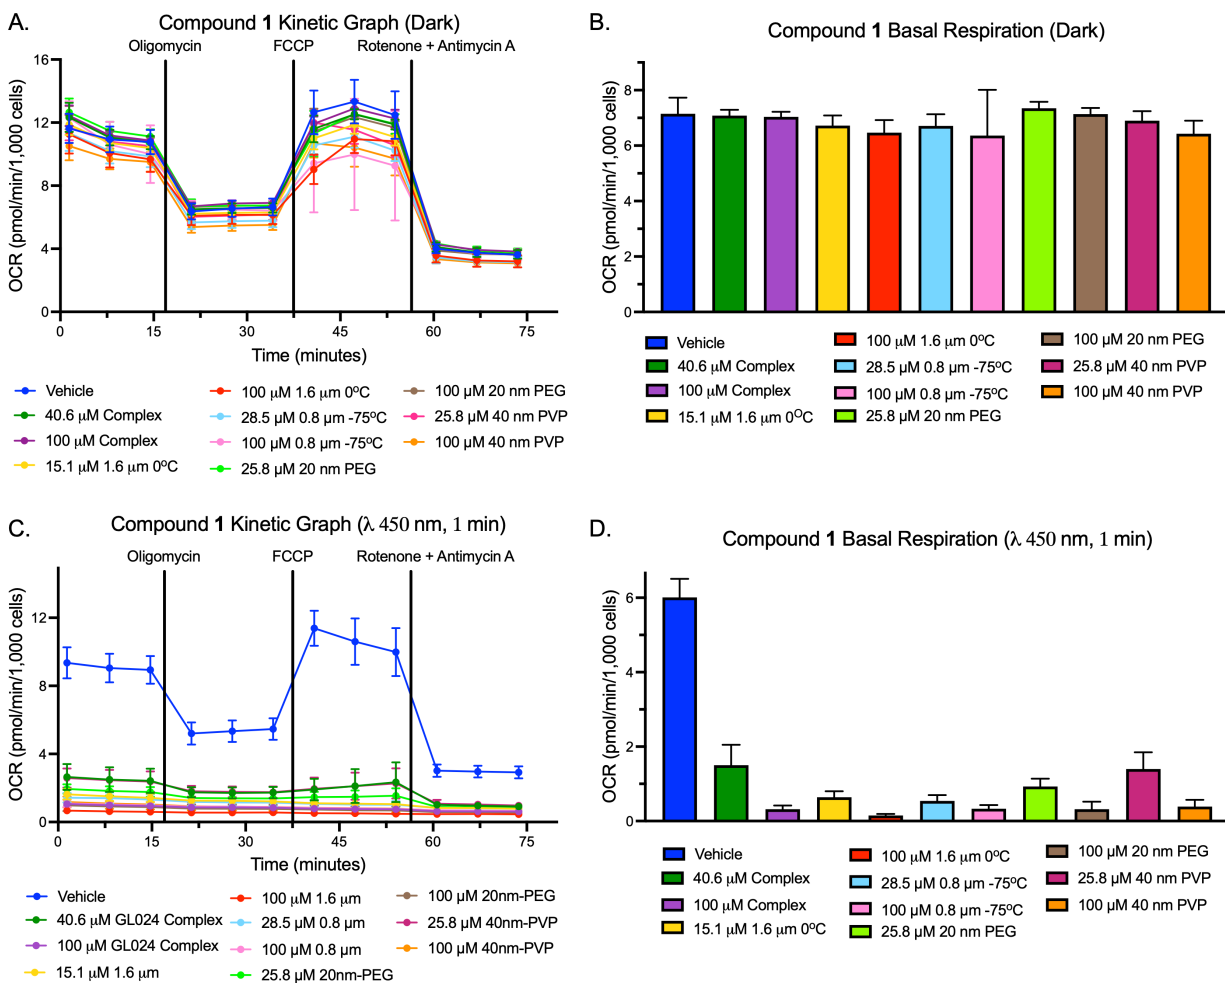

**Figure S35.** Seahorse extracellular flux analysis and basal respiration of compound **1** (A-B) in the absence of light and (C-D) with 1 minute indigo light irradiation.

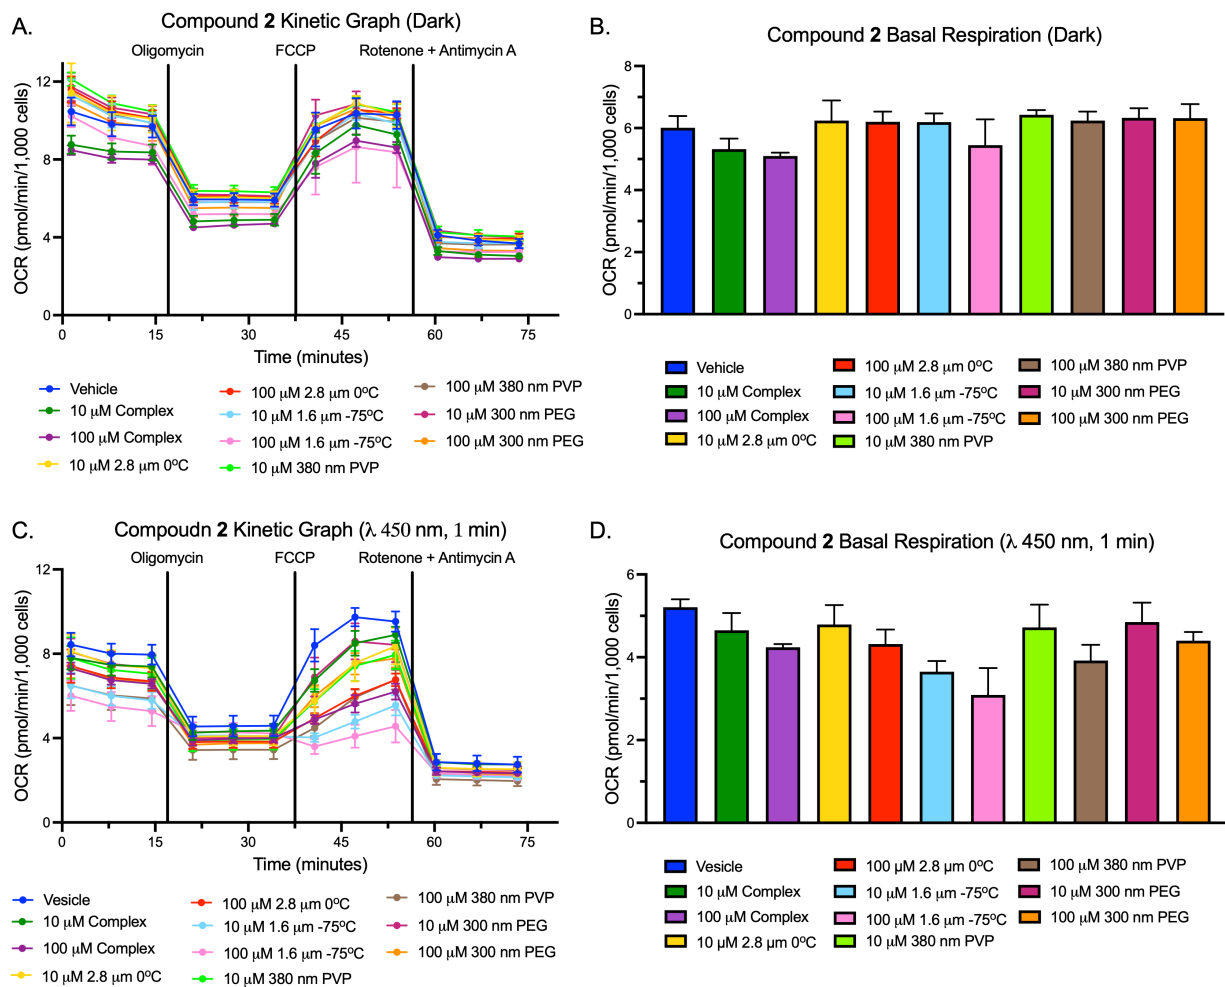

**Figure S36.** Seahorse extracellular flux analysis and basal respiration of compound **2** (A-B) in the absence of light and (C-D) with 1 minute indigo light irradiation.

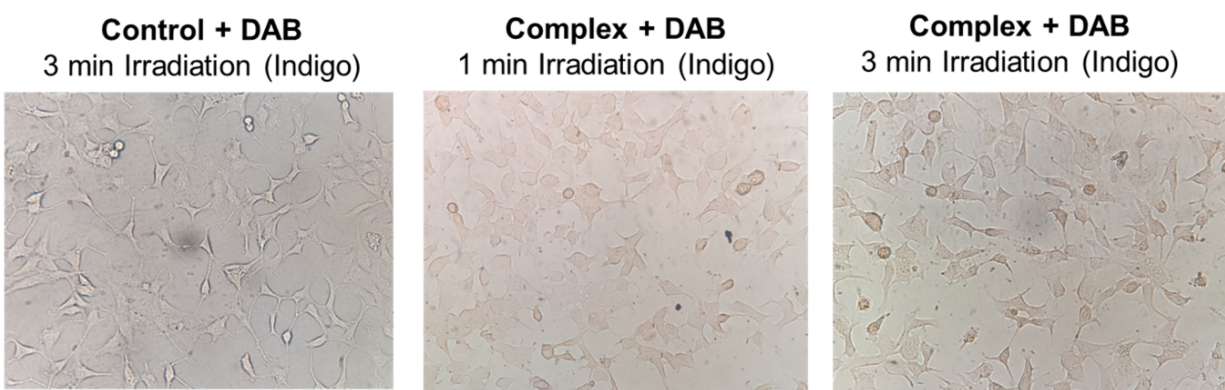

**Figure S37.** DAB polymerization in A459 cells followed by light microscopy as function of the irradiation time in presence of the  $[\text{Ru}(\text{bpy})_3](\text{PF}_6)_2$  complex.



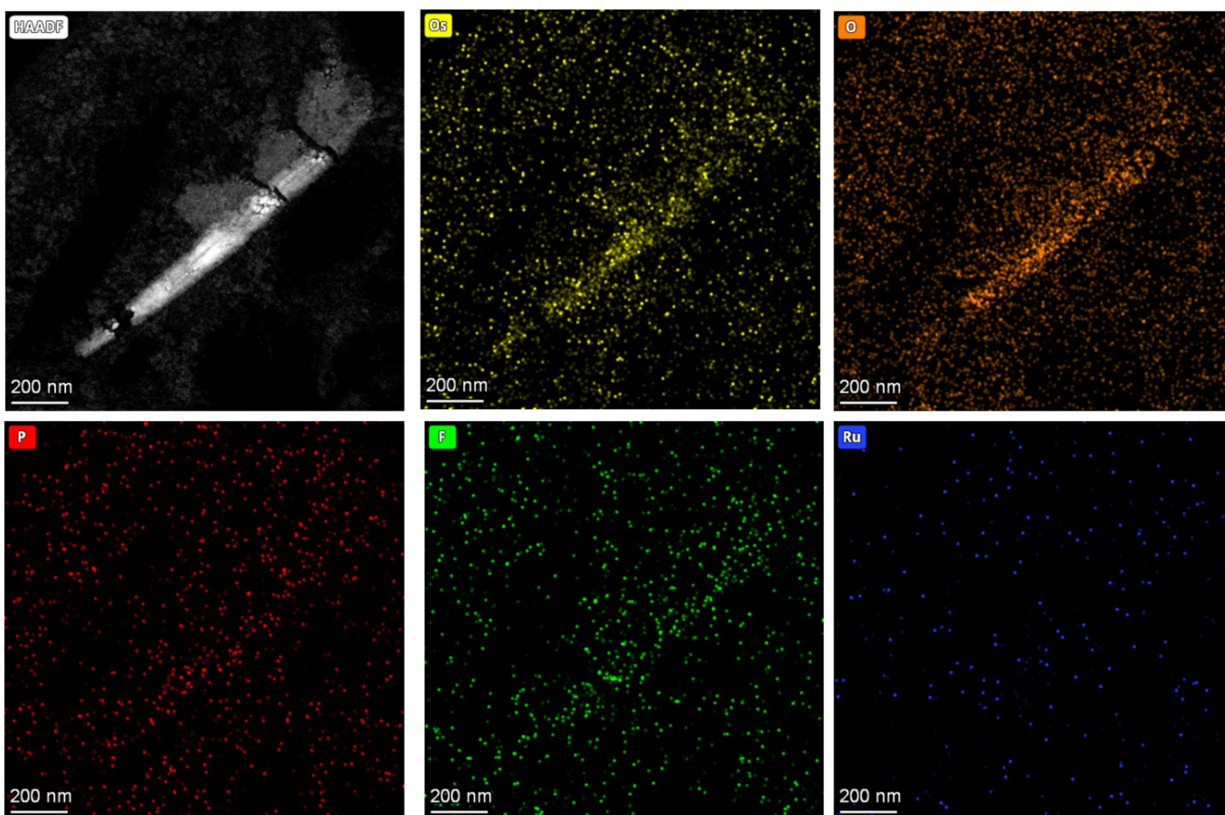

**Figure S38.** TEM, HAADF and EDS mapping (Os, O, P, F, Ru) of a 1.6  $\mu\text{m}$  particle undergoing dissolution in A459 cells.

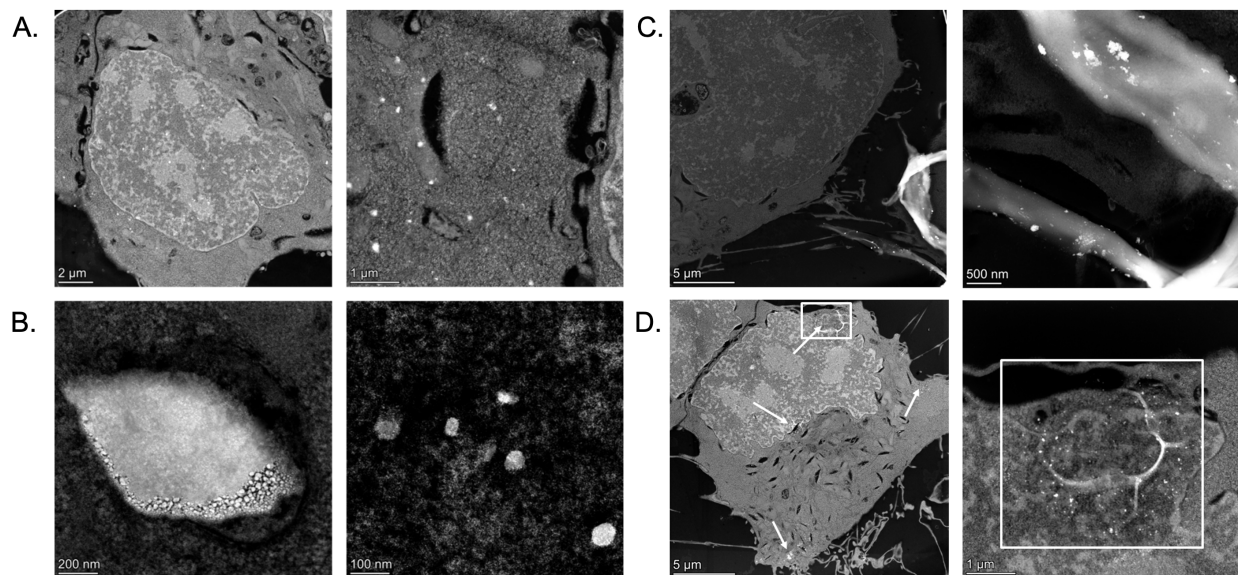

**Figure S39.** STEM images of A549 cells cross sections treated with compound 1 soluble complex and 40 nm PVP particles. (A) DAB deposit found in nucleus and cytosol, (B) dissolution

process of aggregate into small particles, (C) 40 nm particles of 1 embedded in PVP biodegradable film, (D) release of the nanoparticles in the cytosol and nucleus.

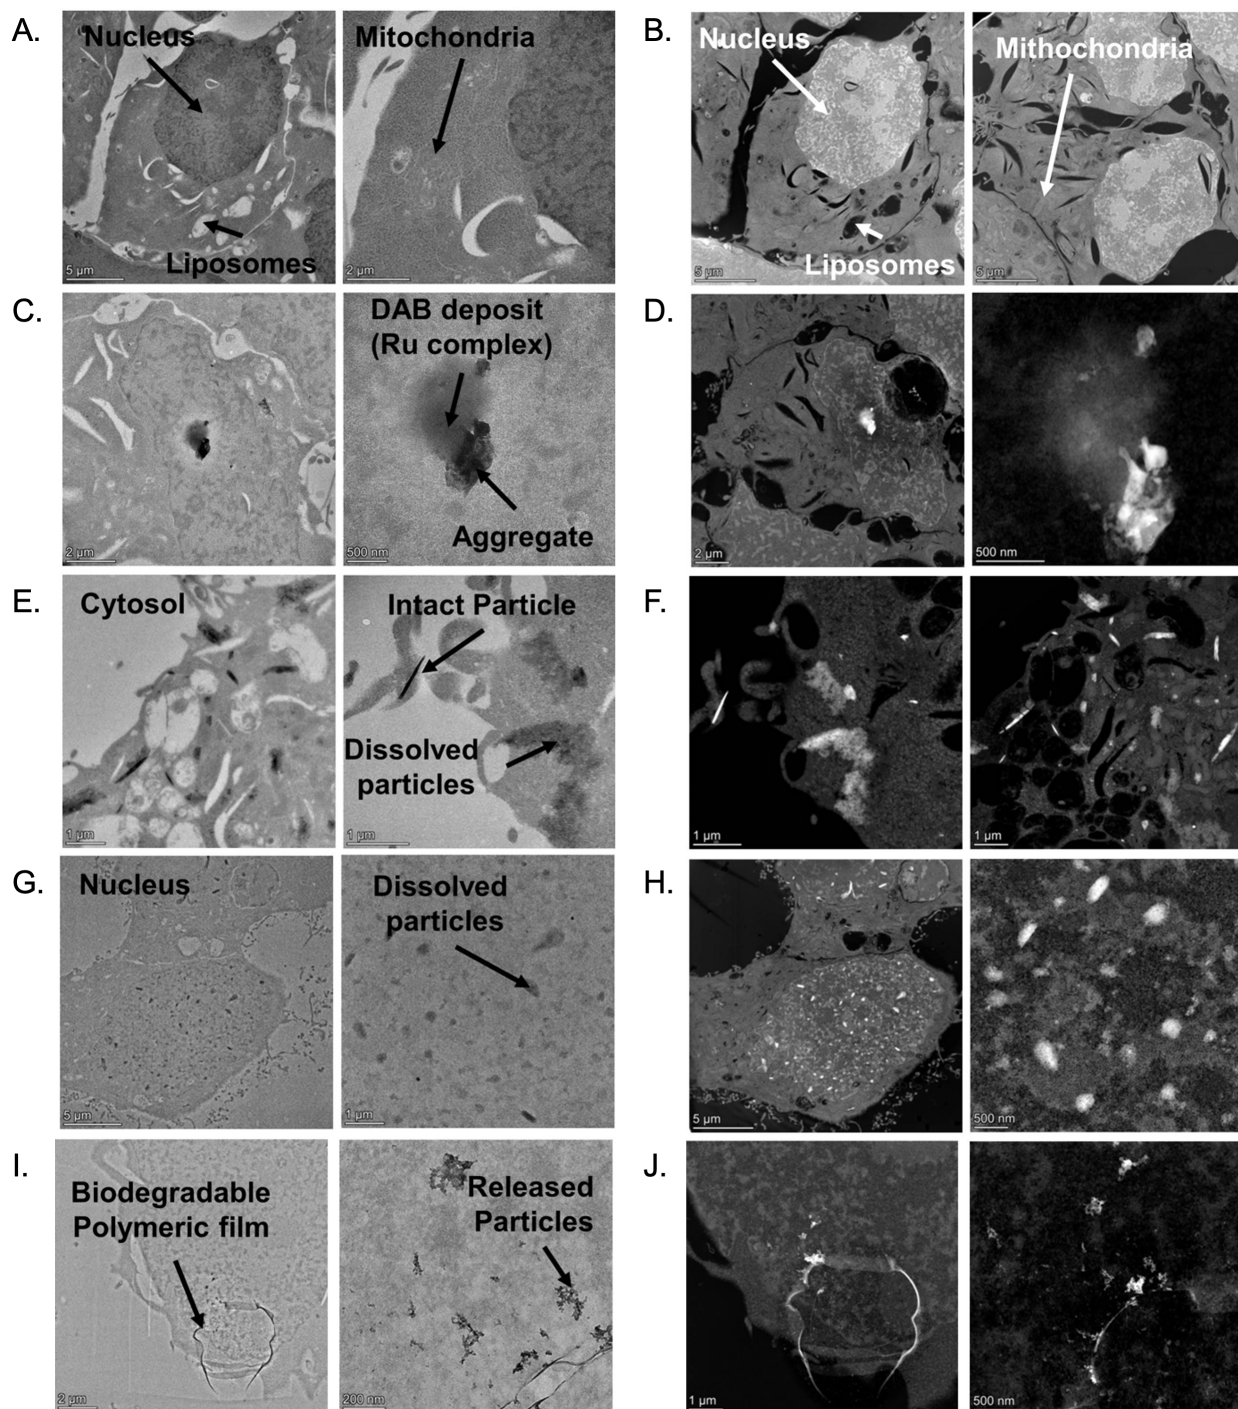

**Figure S40.** TEM (left) and STEM (right) images of A459 cell cross sections for cells (A-B) untreated or treated with 20  $\mu\text{M}$  of (C-D) compound 1, (E-H) 1.6  $\mu\text{m}$  particles and (I-J) 40 nm PVP particles for 16 hours.

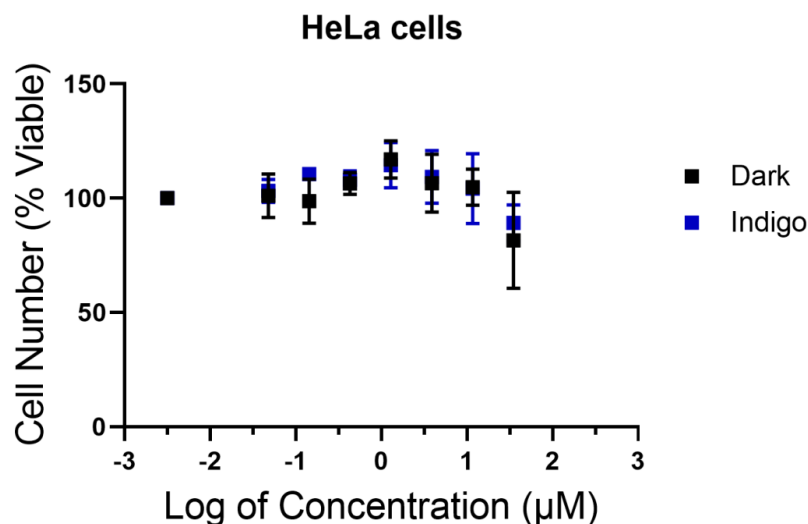

**Figure S41.** HeLa cells viability after incubation for 72h in the dark or after irradiation (Indigo light) for 1 min with  $[\text{Ru}(\text{bpy})_2(\text{dmbpy})](\text{PF}_6)_2$  complex.

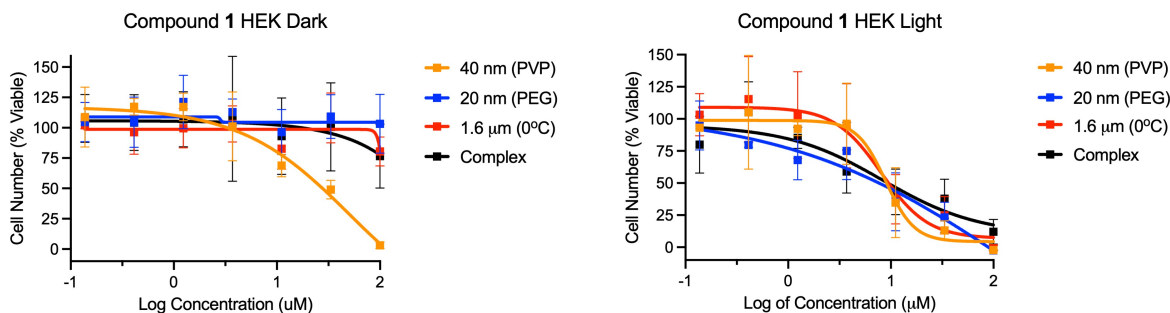

**Figure S42.** Cytotoxicity dose responses of compound **1** and associated particles in HEK cells. Samples were either protected from light for the dark condition or exposed to indigo light for 1 minute ( $t = 1\text{ min}$ ,  $\lambda = 450\text{ nm}$ ,  $P = 29.1\text{ J/cm}^2$ ).
